# Supplementary material for: Associations of serum liver enzyme levels and their changes over time with all-cause and cause-specific mortality in the general population: a large-scale national health screening cohort study
Source: PubMed Central journal article supplement — BMJ Open. 2019 Jun 1;9(5):e026965. doi: 10.1136/bmjopen-2018-026965 (PMC6549731; doi:10.1136/bmjopen-2018-026965), 2019-06-01
Supplement: bmjopen-2018-026965.draft_revisions.pdf [file bmjopen-2018-026965.draft_revisions.pdf]

# BMJ Open

BMJ Open is committed to open peer review. As part of this commitment we make the peer review history of every article we publish publicly available.

When an article is published we post the peer reviewers' comments and the authors' responses online. We also post the versions of the paper that were used during peer review. These are the versions that the peer review comments apply to.

The versions of the paper that follow are the versions that were submitted during the peer review process. They are not the versions of record or the final published versions. They should not be cited or distributed as the published version of this manuscript.

BMJ Open is an open access journal and the full, final, typeset and author-corrected version of record of the manuscript is available on our site with no access controls, subscription charges or pay-per-view fees (<http://bmjopen.bmj.com>).

If you have any questions on BMJ Open's open peer review process please email [info.bmjopen@bmj.com](mailto:info.bmjopen@bmj.com)

# BMJ Open

## Associations of serum liver enzyme levels and their changes over time with all-cause and cause-specific mortality in the general population: a large-scale national health screening cohort study

|                               |                                                                                                                                                                                                                                                                                                                                                                                                                                                                                                                                                                                                                                               |
|-------------------------------|-----------------------------------------------------------------------------------------------------------------------------------------------------------------------------------------------------------------------------------------------------------------------------------------------------------------------------------------------------------------------------------------------------------------------------------------------------------------------------------------------------------------------------------------------------------------------------------------------------------------------------------------------|
| Journal:                      | <i>BMJ Open</i>                                                                                                                                                                                                                                                                                                                                                                                                                                                                                                                                                                                                                               |
| Manuscript ID                 | bmjopen-2018-026965                                                                                                                                                                                                                                                                                                                                                                                                                                                                                                                                                                                                                           |
| Article Type:                 | Research                                                                                                                                                                                                                                                                                                                                                                                                                                                                                                                                                                                                                                      |
| Date Submitted by the Author: | 02-Oct-2018                                                                                                                                                                                                                                                                                                                                                                                                                                                                                                                                                                                                                                   |
| Complete List of Authors:     | Kim, Kyoung-Nam; Seoul National University Hospital, Division of Public Health and Preventive Medicine<br>Joo, Jungmin; Seoul National University Hospital, Division of Public Health and Preventive Medicine<br>Sung, Ho Kyung; Seoul National University Hospital, Division of Public Health and Preventive Medicine<br>Kim, Chee Hae; Seoul National University Hospital, Division of Public Health and Preventive Medicine<br>Kim, Haebin; Seoul National University Hospital, Division of Public Health and Preventive Medicine<br>Kwon, Yong Jin; Seoul National University Hospital, Division of Public Health and Preventive Medicine |
| Keywords:                     | Alanine aminotransferase, aspartate aminotransferase, gamma glutamyltransferase, mortality, non-linear associations                                                                                                                                                                                                                                                                                                                                                                                                                                                                                                                           |
|                               |                                                                                                                                                                                                                                                                                                                                                                                                                                                                                                                                                                                                                                               |

SCHOLARONE™  
Manuscripts

1  
2  
3  
4 **Associations of serum liver enzyme levels and their changes over time with all-cause and**  
5 **cause-specific mortality in the general population: a large-scale national health screening**  
6 **cohort study**  
7  
8  
9

10  
11  
12  
13  
14  
15 Kyoung-Nam Kim,<sup>1,2</sup> Jungmin Joo,<sup>1</sup> Ho Kyung Sung,<sup>1</sup> Chee Hae Kim,<sup>1</sup> Haebin Kim,<sup>1</sup> Yong Jin  
16  
17 Kwon<sup>1,3</sup>  
18

19  
20  
21  
22  
23 <sup>1</sup>Division of Public Health and Preventive Medicine, Seoul National University Hospital, Seoul,  
24  
25 Republic of Korea  
26

27  
28 <sup>2</sup>Department of Preventive Medicine, Seoul National University College of Medicine, Seoul,  
29  
30 Republic of Korea  
31

32  
33 <sup>3</sup>Department of Forensic Medicine, Seoul National University College of Medicine, Seoul,  
34  
35 Republic of Korea  
36  
37

38  
39  
40  
41  
42 **Correspondence to**  
43

44  
45 Yong Jin Kwon, MD, PhD  
46

47  
48 Division of Public Health and Preventive Medicine, Seoul National University Hospital  
49

50  
51 101, Daehak-Ro Jongno-Gu, Seoul 03080, Republic of Korea  
52  
53

1  
2  
3  
4 Tel.: +82 2 2072 0373; Fax: +82 2 2072 0374; Email: [301kwon@snuh.org](mailto:301kwon@snuh.org)  
5  
6

7 Manuscript word count: 2,800 words  
8  
9  
10  
11  
12  
13  
14  
15  
16  
17  
18  
19  
20  
21  
22  
23  
24  
25  
26  
27  
28  
29  
30  
31  
32  
33  
34  
35  
36  
37  
38  
39  
40  
41  
42  
43  
44  
45  
46  
47  
48  
49  
50  
51  
52  
53  
54

For peer review only

## ABSTRACT

**Objectives** To investigate the associations of the levels of liver enzymes such as alanine aminotransferase (ALT), aspartate aminotransferase (AST), and gamma glutamyltransferase (GGT) at baseline and their changes over time with mortality.

**Design** Cohort study.

**Setting, participants, and outcome measures** We analyzed the data of 484,472 individuals from the National Health Insurance Service-National Health Screening cohort (2002–2013). We used two exposure indices: 1) deciles of baseline ALT, AST, and GGT levels measured in 2002 or 2003 and 2) deciles of changes in ALT, AST, and GGT levels over a 4-year period (2002–2006 or 2003–2007). We constructed Cox and cause-specific proportional hazard models adjusted for potential confounders to evaluate the associations of these exposure indices with all-cause and cause-specific mortality (2008–2013), respectively.

**Results** We found non-monotonic dose-response associations between the baseline levels of ALT and AST and all-cause mortality. Meanwhile, we found a monotonic non-linear association between the baseline levels of GGT and all-cause mortality. Compared with the 9<sup>th</sup>, 6<sup>th</sup>, and 4<sup>th</sup> deciles of changes in ALT (8–13 U/L), AST (1 U/L), and GGT (-3 to -2 U/L) over time, respectively, the risks of all-cause mortality increased in both the higher and lower deciles of changes in the corresponding liver enzyme levels. These non-monotonic dose-response associations between changes in the liver enzyme levels and mortality remained when analyses were stratified by the medians or quartiles of the baseline liver enzyme levels.

1  
2  
3  
4 **Conclusions** The levels of liver enzymes at baseline and over time showed non-linear  
5  
6 associations with mortality. These results suggest that both the baseline liver enzyme levels and  
7  
8 changes in the levels over time can be used to predict mortality.  
9  
10

11  
12 **Key words**

13  
14 Alanine aminotransferase, aspartate aminotransferase, gamma glutamyltransferase, mortality,  
15  
16 non-linear associations  
17  
18  
19  
20  
21  
22  
23  
24  
25  
26  
27  
28  
29  
30  
31  
32  
33  
34  
35  
36  
37  
38  
39  
40  
41  
42  
43  
44  
45  
46  
47  
48  
49  
50  
51  
52  
53  
54

## Article Summary

### Strengths and limitations of this study

- First study to report non-monotonic dose-response associations between changes in liver enzyme levels over time and mortality.
- Conducted longitudinal analyses using a large-scale cohort constructed from national administration data, which has a negligible follow-up loss.
- Identified the dates and causes of death using a national database maintained by Statistics Korea, which covers all individuals residing in the Republic of Korea and has high accuracy (>90%).
- Information on albumin, alkaline phosphatase, and conjugated and unconjugated bilirubin levels was not available.
- Used claims data in which information on sociodemographic factors, lifestyles, past medical histories, and family histories is insufficient.

## INTRODUCTION

Serum levels of liver enzymes such as alanine aminotransferase (ALT), aspartate aminotransferase (AST), and gamma glutamyltransferase (GGT) are highly sensitive to liver dysfunction and damage.[1] Because assays for these liver enzymes are cost-effective, they are widely used during general health check-ups worldwide.[2,3]

Although liver enzyme levels have been associated with various health outcomes such as cardiovascular diseases,[4] type 2 diabetes mellitus,[5] and cancer,[6] the associations between liver enzyme levels and mortality remained unclear. Previous studies reported positive, null, and inverse associations between liver enzyme levels and mortality (reviewed by Kunstor et al.[3]).

To explain this inconsistency, recent studies suggested non-monotonic dose-response associations between liver enzyme levels and mortality, although studies investigating these associations remain scarce.[3,7,8]

Liver enzyme levels can increase due to factors such as liver damage and injury and can decrease due to factors such as hepatic aging, frailty, and reduced hepatic blood circulation.[9,10]

Therefore, changes (increases or decreases) in the levels of these enzymes over time may be associated with higher mortality independent of baseline liver enzyme levels. However, to our knowledge, no study has explored the possibility of non-monotonic dose-response associations between changes in liver enzyme levels over time and mortality.

Therefore, in the present study, we hypothesized that not only higher baseline liver enzyme levels but also lower baseline levels are associated with higher mortality. In addition, we hypothesized that the increase or decrease in liver enzyme levels over time is also associated



1  
2  
3  
4 with higher mortality independent of baseline liver enzyme levels. We evaluated these  
5  
6 hypotheses using a longitudinal study design with a large-scale ( $n > 500,000$ ) national health  
7  
8 screening cohort in which serum liver enzyme levels were repeatedly measured.  
9  
10

## 11 12 13 14 15 **METHODS**

### 16 17 18 Study population

19  
20 The present study used data from the National Health Insurance Service-National Health  
21  
22 Screening Cohort (NHIS-HEALS) of the Republic of Korea. Detailed information on the NHIS-  
23  
24 HEALS has been presented elsewhere.[11] Briefly, the NHIS-HEALS is a de-identified cohort  
25  
26 released to researchers by the NHIS for the purpose of public research. Several epidemiological  
27  
28 studies have been published using this data.[12–14] The NHIS-HEALS contains the data of  
29  
30 514,866 individuals, representing a 10% random sample of all participants in the National Health  
31  
32 Screening Program between 2002 and 2003 (data collected during this period comprise the  
33  
34 baseline) who were followed up to December 31, 2013. In the Republic of Korea, all individuals  
35  
36 aged  $\geq 40$  years are invited to participate at least every 2 year in this general, free-of-charge  
37  
38 health screening program conducted at designated healthcare institutions that meet the quality  
39  
40 standards set by the Framework Act on Health Examinations. The rate of participation in the  
41  
42 National Health Screening Program was 43.2% in 2003, and increased gradually to 74.8% in  
43  
44 2014.[14] The prevalence rates of common diseases such as hypertension and type 2 diabetes  
45  
46 mellitus in the NHIS-HEALS are generally similar to those reported in a nationally  
47  
48 representative sample.[11]  
49  
50  
51  
52  
53

1  
2  
3  
4 The NHIS-HEALS includes various types of information, such as sociodemographic factors,  
5 lifestyles, past medical histories, and family histories (collected from self-reported questionnaires  
6 during the national health screening), health screening results (from physical examinations and  
7 clinical laboratory tests during the national health screening), healthcare usage (from claims  
8 data), and dates and causes of death (from Statistics Korea).  
9  
10  
11  
12  
13  
14  
15

16 In the present study, from a total of 514,866 individuals included in the NHIS-HEALS, we  
17 sequentially excluded those who died between 2002 and 2007 ( $n = 13,278$ , 2.6%), those without  
18 any liver enzyme data between 2002 and 2003 ( $n = 494$ , 0.1%), and those with hepatitis or  
19 chronic liver disease up to 2007 ( $n = 16,622$ , 3.2%). Therefore, 484,472 individuals (94.1%)  
20 were included in the final analysis. The Institutional Review Board (IRB) of Seoul National  
21 University Hospital reviewed and approved the study protocol (IRB no. E-1804-045-936).  
22  
23 Because the present study used claims data released to researchers after de-identification process,  
24 which is performed by the NHIS, the IRB of Seoul National University Hospital waived the  
25 requirement of informed consent for study participation. All experiments were conducted in  
26 accordance with the relevant guidelines and regulations.  
27  
28  
29  
30  
31  
32  
33  
34  
35  
36  
37  
38  
39  
40  
41  
42

### 43 Patient and public involvement

44 Patients were not recruited or involved in this study.  
45  
46  
47  
48  
49  
50  
51

### 52 Exposures

1  
2  
3  
4 We used two exposure indices: 1) deciles of the baseline levels of ALT, AST, and GGT measured  
5  
6 in 2002 or 2003 and 2) deciles of changes in the ALT, AST, and GGT levels over a 4-year period  
7  
8 (2002–2006 or 2003–2007) (figure 1). The first exposure index was used in an analysis of the  
9  
10 association between baseline liver enzyme levels and mortality, while the second was used in an  
11  
12 analysis of the association between changes in liver enzyme levels and mortality. If both the  
13  
14 earlier and later exposure indices were available, the latter (baseline liver enzyme levels in 2003  
15  
16 or changes in liver enzyme levels between 2003 and 2007) was assigned as the exposure index  
17  
18 for each individual.  
19  
20  
21  
22  
23  
24  
25

## 26 Outcomes

27  
28  
29 The outcomes of the present study were all-cause and cause-specific mortality occurring between  
30  
31 January 1, 2008 and December 31, 2013 (figure 1). Information on the dates and causes of death  
32  
33 was obtained from Statistics Korea and merged with other data by the NHIS via personal  
34  
35 identification numbers. The various causes of death were coded according to the International  
36  
37 Classification of Disease, 10<sup>th</sup> Revision (ICD-10). For this analysis, we considered deaths from  
38  
39 cardiovascular disease (defined as ICD-10 codes I20–I25, I50, and I60–I70), cancer (C00–C97),  
40  
41 diabetes mellitus (E10–E14), and liver disease (B15–B19 and K70–K77), according to previous  
42  
43 studies.[7,8,15]  
44  
45  
46  
47  
48  
49  
50

## 51 Covariates

1  
2  
3  
4 Based on previous reports and existing biomedical knowledge,[3,7–9,15–17] we identified the  
5  
6 following potential confounders and included them as covariates for further analyses: age (years),  
7  
8 sex, household income (decile), smoking status (non-smoker, ex-smoker, or smoker), alcohol  
9  
10 consumption (none,  $\leq 1$ –2, or  $\geq 3$ –4 times/week), physical activity (did not exercise,  $\leq 1$ –2, or  $\geq 3$ –  
11  
12 4 times/week), body mass index ( $< 18.5$ , 18.5–22.9, 23–24.9, 25–29.9, or  $\geq 30$  kg/m<sup>2</sup>), systolic  
13  
14 blood pressure ( $< 120$ , 120–139.9, or  $\geq 140$  mmHg), diastolic blood pressure ( $< 80$ , 80–89.9, or  
15  
16  $\geq 90$  mmHg), fasting glucose levels ( $< 70$ , 70–99.9, 100–125.9, or  $\geq 126$  mmHg), history of heart  
17  
18 disease (yes or no), history of stroke (yes or no), and history of cancer (yes or no). Information  
19  
20 about these variables was collected from the National Health Screening Program at baseline  
21  
22 (2002–2003). We created a missing indicator category for the missing values (0.03–3.4%) of the  
23  
24 categorical variables (table 1).  
25  
26  
27  
28  
29  
30  
31  
32

### 33 Statistical analysis

34  
35  
36 We constructed Cox proportional hazard models adjusted for the above-mentioned covariates to  
37  
38 investigate the associations of exposure indices (deciles of baseline liver enzyme levels and  
39  
40 deciles of changes in liver enzyme levels) with all-cause mortality. Since the associations  
41  
42 between changes in liver enzyme levels and mortality may differ according to the baseline liver  
43  
44 enzyme levels, we also divided the study population into those with values above and below the  
45  
46 medians or quartiles of the baseline levels of ALT, AST, and GGT. We then assessed the  
47  
48 associations between deciles of changes in the liver enzyme levels and all-cause mortality in  
49  
50 each stratum.  
51  
52  
53  
54

1  
2  
3  
4 We evaluated the non-linearity of the associations (non-monotonic dose-response or monotonic  
5 non-linear associations) by 1) visually inspecting the shapes of the associations in the analysis  
6 using categorized exposure indices and 2) testing the squared-terms of the log<sub>2</sub>-transformed  
7 continuous baseline or changes in liver enzyme levels that were added to Cox models including  
8 the log<sub>2</sub>-transformed baseline or changes in liver enzyme levels and the same covariates.  
9  
10  
11  
12  
13  
14

15  
16 To evaluate the associations of deciles of the baseline and changes in liver enzyme levels with  
17 cause-specific mortality (i.e., deaths from cardiovascular disease, cancer, diabetes mellitus, and  
18 liver disease), we constructed cause-specific proportional hazard models adjusted for the same  
19 covariates. In these competing risk analyses, we estimated cause-specific hazards rather than  
20 sub-distribution hazards, because the hazard ratios (HRs) from cause-specific proportional  
21 hazard models would be easily interpretable and could be used to draw public health  
22 implications.[18,19]  
23  
24  
25  
26  
27  
28  
29  
30  
31  
32

33 In a sensitivity analysis, we repeated all analyses using sex-specific cut-points for deciles of the  
34 baseline liver enzyme levels and changes in liver enzyme levels, instead of the above mentioned  
35 sex-non-specific cut-points, to confirm the robustness of the results.[7]  
36  
37  
38  
39  
40

41 In both the Cox and cause-specific proportional hazard models, the follow-up duration was  
42 calculated in months from January 1, 2008 to the date of death or December 31, 2013 (if death  
43 did not occur). For analyses using categorized exposure indices, we designated categories with  
44 the lowest betas for each outcome of interest in the association analysis as the referent categories.  
45  
46  
47  
48  
49 We used SAS version 9.4 (SAS Institute Inc.) for all analyses.  
50  
51  
52  
53  
54

## RESULTS

Of the 484,472 study participants, the mean age was 53.0 years (range: 40–80 years), and 53.3% were men. A larger proportion of participants had higher income levels (household income deciles 9–10, 33.3% vs. deciles 0–2, 15.9%). A majority of the study participants were non-smokers (65.5%), did not drink alcohol (56.1%), and did not exercise regularly (55.8%). Most participants had no history of heart disease, stroke, or cancer (table 1).

Compared with the 4<sup>th</sup> decile of baseline ALT levels (17–18 U/L), the risk of all-cause mortality was higher in both the higher and lower baseline ALT deciles (10<sup>th</sup> decile: HR = 1.53, 95% confidence interval [CI]: 1.44, 1.62; 1<sup>st</sup> decile: HR = 1.16, 95% CI: 1.10, 1.23). Similarly, compared with the 4<sup>th</sup> decile of baseline AST levels (21 U/L), the risk of all-cause mortality was also higher in both the higher and lower baseline AST deciles (10<sup>th</sup> decile: HR = 1.70, 95% CI: 1.59, 1.81; 1<sup>st</sup> decile: HR = 1.15, 95% CI: 1.07, 1.24). When compared with the 1<sup>st</sup> decile of baseline GGT levels ( $\leq$ 11 U/L), the all-cause mortality risk was higher in higher baseline GGT deciles (10<sup>th</sup> decile: HR = 2.05, 95% CI: 1.93, 2.18) (table 2). We confirmed the non-linearity of these associations by testing the squared-terms of the log<sub>2</sub>-transformed ALT, AST, and GGT levels added to the Cox models (all *p*-values for the squared-terms < 0.0001).

We also assessed the associations of deciles of changes in the liver enzyme levels over a 4-year period with all-cause mortality. Compared with the 9<sup>th</sup> decile of ALT changes (8–13 U/L), the 6<sup>th</sup> decile of AST changes (1 U/L), and the 4<sup>th</sup> decile of GGT changes (-3 to -2 U/L), respectively, the risk of all-cause mortality was higher in both the higher and lower deciles of changes in the corresponding liver enzyme levels (10<sup>th</sup> decile: HR = 1.36, 95% CI: 1.24, 1.48, 1<sup>st</sup> decile: HR =

1  
2  
3  
4 1.46, 95% CI: 1.34, 1.59 for ALT; 10<sup>th</sup> decile: HR = 1.55, 95% CI: 1.40, 1.71, 1<sup>st</sup> decile: HR =  
5  
6 1.53, 95% CI: 1.38, 1.69 for AST; 10<sup>th</sup> decile: HR = 1.71, 95% CI: 1.56, 1.88, 1<sup>st</sup> decile: HR =  
7  
8 1.67, 95% CI: 1.52, 1.84 for GGT) (table 3). We then tested the squared-terms of the log2-  
9  
10 transformed changes in ALT, AST, and GGT and confirmed the non-linearity of the associations  
11  
12 between the changes in liver enzyme levels and mortality (all *p*-values for the squared-terms <  
13  
14 0.0001).  
15  
16

17  
18 When we performed stratified analyses by the medians or quartiles of the baseline liver enzyme  
19  
20 levels, the same non-monotonic dose-response associations between the deciles of changes in  
21  
22 liver enzyme levels and all-cause mortality remained in each stratum (figure 2; online  
23  
24 supplementary figure 1), similar to the results of the non-stratified analysis (table 3).  
25  
26

27  
28 In analyses of the associations between the deciles of baseline liver enzyme levels and cause-  
29  
30 specific mortality (mortality due to cardiovascular disease, cancer, diabetes mellitus, and liver  
31  
32 disease), we found non-monotonic dose-response associations of baseline ALT and AST levels  
33  
34 with mortality due to cardiovascular disease, cancer, and diabetes mellitus, whereas we found  
35  
36 monotonic non-linear associations in other cases (online supplementary figure 2). When we  
37  
38 analyzed the associations between the deciles of changes in the liver enzyme levels and cause-  
39  
40 specific mortality, we found non-monotonic dose-response associations in all cases (online  
41  
42 supplementary figure 3).  
43  
44  
45

46  
47 In sensitivity analyses based on sex-specific deciles of the baseline and changes in liver enzyme  
48  
49 levels, the results remained robust and did not change appreciably (data not shown).  
50  
51  
52

## DISCUSSION

In the present study using the large-scale national health screening cohort, we found non-linear (non-monotonic dose-response or monotonic non-linear) associations of baseline liver enzyme levels and changes in these levels over time with both all-cause and cause-specific mortality. The non-monotonic dose-response associations between changes in the liver enzyme levels and mortality remained after stratifying the study population into subgroups according to the baseline liver enzyme levels.

Although some previous studies have reported inverse associations between ALT levels and all-cause mortality,[9,17,20] other studies have demonstrated positive associations.[21,22] Similarly, some studies have described positive associations between AST levels and all-cause mortality,[21,23,24] whereas other studies found no such associations.[25,26] This heterogeneity may be explained by the increased risk of mortality associated with both higher and lower baseline levels of ALT and AST (non-monotonic dose-response associations), as demonstrated in the present study.[3,7,8] Meanwhile, most previous studies have reported positive associations between baseline GGT levels and all-cause mortality.[15,17] The results of the present study, which suggest the presence of a monotonic non-linear association between the baseline GGT levels and all-cause mortality, may explain those earlier findings.

In the present study, larger changes (both increases and decreases) in the ALT, AST, and GGT levels over a 4-year period were associated with a higher risk of all-cause mortality when compared with smaller changes. These non-linear associations remained even after the participants were stratified according to the baseline liver enzyme levels. These results suggest



1  
2  
3  
4 that changes in liver enzyme levels over time as well as baseline levels can be used to predict  
5 mortality and assess risk by clinicians and public health practitioners. To our knowledge, this is  
6 the first study to demonstrate non-monotonic dose-response associations between changes in  
7 liver enzyme levels and mortality; further studies are warranted to confirm the findings.  
8  
9  
10  
11  
12

13  
14 In a study based on a representative U.S. population data, lower baseline ALT levels were found  
15 to be associated with higher risks of cardiovascular disease, cancer, and liver disease mortality,  
16 whereas higher ALT levels were only associated with a higher risk of liver disease mortality.[7]  
17  
18

19 In another study based on a representative sample of the U.S. population, higher ALT levels were  
20 associated with a higher risk of liver disease mortality, whereas higher GGT levels were  
21 associated with higher risks of cancer, diabetes mellitus, and liver disease mortality.[15] A study  
22 using data from a prospective elderly cohort reported an association of higher AST levels with an  
23 increased risk of cancer mortality, as well as an association of higher GGT levels with an  
24 increased risk of cardiovascular disease mortality.[8] Although the results of the present study  
25 were generally consistent with those of previous studies,[7,8,15] some inconsistencies were also  
26 found (e.g., positive associations of baseline ALT levels with cardiovascular, cancer, and diabetes  
27 mellitus mortality in the present study but not in previous studies). These discrepancies might be  
28 attributable to factors such as differences in the accuracy of cause of death data, study  
29 populations, adjusted covariates, and analytical methods. As the associations of baseline and  
30 changes in liver enzyme levels with cause-specific mortality have not been thoroughly  
31 investigated, additional studies are needed, particularly those using changes in liver enzyme  
32 levels as explanatory variables.  
33  
34  
35  
36  
37  
38  
39  
40  
41  
42  
43  
44  
45  
46  
47  
48  
49  
50  
51  
52  
53  
54

1  
2  
3  
4 Serum liver enzyme levels may increase in response to various factors, including liver damage  
5 and cell destruction (e.g., hepatocytes, biliary epithelium, and other cells of the organs such as  
6 the heart, skeletal muscle, and kidney),[2,27] and may decrease in response to factors such as age  
7 and frailty-related reductions in liver size and blood circulation.[9,10,28] Therefore, changes  
8 (both increases and decreases) in liver enzyme levels over time may reflect these conditions  
9 related to the deterioration of liver function and could thus be associated with a higher risk of  
10 mortality.  
11  
12  
13  
14  
15  
16  
17  
18  
19  
20

21 The present study has some limitations. First, although the NHIS-HEALS provides information  
22 on serum ALT, AST, and GGT levels, data from other standard liver panel tests, such as albumin,  
23 alkaline phosphatase, and conjugated and unconjugated bilirubin levels, are not available. This  
24 limits our ability to assess liver function comprehensively. Second, the present study used data  
25 that were not primarily collected for the purpose of research. Therefore, information on the  
26 sociodemographic factors, lifestyles, past medical histories, and family histories are insufficient,  
27 leading to the possibility of residual confounding.  
28  
29  
30  
31  
32  
33  
34  
35  
36  
37

38 However, the present study also has notable strengths. First, to our knowledge, this is the first  
39 study to report non-monotonic dose-response associations between changes in liver enzyme  
40 levels over time and mortality. Second, we used a large-scale cohort constructed from national  
41 administration data, which has a negligible follow-up loss. The large sample size ( $n = 484,472$ )  
42 of the present study allowed us to evaluate the potential associations with sufficient power. Third,  
43 we identified the dates and causes of death using a national database maintained by Statistics  
44 Korea, which covers all individuals residing in the Republic of Korea. The accuracy of the  
45  
46  
47  
48  
49  
50  
51  
52  
53  
54

1  
2  
3  
4 recorded causes of death in this database is considered high (>90%).[29]  
5  
6  
7  
8  
9

## 10 **CONCLUSIONS**

11  
12  
13 We found non-linear associations of the baseline liver enzyme levels and their changes over time  
14  
15 with risks of mortality. The results of the present study suggest that changes in liver enzyme  
16  
17 levels, as well as the baseline levels, can be used to predict health outcomes such as mortality  
18  
19 and to assess risk in clinical and public health settings.  
20  
21  
22  
23  
24  
25

## 26 **Acknowledgements**

27  
28  
29 We would like to thank the National Health Insurance Service for their cooperation. We also  
30  
31 would like to thank all those who planned, administered, conducted, and participated in the  
32  
33 National Health Screening Program.  
34  
35

## 36 **Author Contributions**

37  
38  
39 KK, JJ, HKS, CHK, HK, and YJK contributed to conception and design of the study. KNK  
40  
41 conducted statistical analyses and wrote the initial manuscript. JJ, HKS, CHK, HK, and YJK  
42  
43 reviewed and revised the manuscript. All authors read and approved the final manuscript.  
44  
45  
46

## 47 **Funding**

48  
49  
50 This work was supported by Seoul National University Hospital and the National Health  
51  
52 Insurance Service of the Republic of Korea.  
53  
54

## Disclaimer

The views in this study are those of the authors and not necessarily those of the Seoul National University Hospital or the National Health Insurance Service of the Republic of Korea.

## Competing interests

The authors declare that they have no competing interests.

## Patient consent

Not required.

## Ethics approval

The study protocol was reviewed and approved by the Institutional Review Board of Seoul National University Hospital (IRB no. E-1804-045-936).

## Provenance and peer review

Not commissioned; externally peer reviewed.

## Data sharing statement

The National Health Insurance Service-National Health Screening Cohort (NHIS-HEALS), which is used in the present study, is a de-identified cohort released to researchers by the NHIS for the purpose of public research. The data sets are provided to researchers after the study protocols are approved by the IRB of the researcher's institute and by the NHIS. Researchers can request the data sets through the website <https://nhiss.nhis.or.kr/bd/ay/bdaya001iv.do>.

1  
2  
3  
4  
5  
6  
7  
8  
9  
10  
11  
12  
13  
14  
15  
16  
17  
18  
19  
20  
21  
22  
23  
24  
25  
26  
27  
28  
29  
30  
31  
32  
33  
34  
35  
36  
37  
38  
39  
40  
41  
42  
43  
44  
45  
46  
47  
48  
49  
50  
51  
52  
53  
54  
55  
56  
57  
58  
59  
60

For peer review only

## REFERENCES

- 1 Reid AE. Nonalcoholic steatohepatitis. *Gastroenterology* 2001;**121**:710–23.
- 2 Gowda S, Desai PB, Hull VV, *et al.* A review on laboratory liver function tests. *Pan Afr Med J* 2009;**3**:17.
- 3 Kunutsor SK, Apekey TA, Seddoh D, *et al.* Liver enzymes and risk of all-cause mortality in general populations: a systematic review and meta-analysis. *Int J Epidemiol* 2014;**43**:187–201. doi:10.1093/ije/dyt192
- 4 Kunutsor SK, Apekey TA, Khan H. Liver enzymes and risk of cardiovascular disease in the general population: a meta-analysis of prospective cohort studies. *Atherosclerosis* 2014;**236**:7–17. doi:10.1016/j.atherosclerosis.2014.06.006
- 5 Schneider ALC, Lazo M, Ndumele CE, *et al.* Liver enzymes, race, gender and diabetes risk: the Atherosclerosis Risk in Communities (ARIC) Study. *Diabet Med J Br Diabet Assoc* 2013;**30**:926–33. doi:10.1111/dme.12187
- 6 Kunutsor SK, Apekey TA, Van Hemelrijck M, *et al.* Gamma glutamyltransferase, alanine aminotransferase and risk of cancer: systematic review and meta-analysis. *Int J Cancer* 2015;**136**:1162–70. doi:10.1002/ijc.29084
- 7 Ruhl CE, Everhart JE. The association of low serum alanine aminotransferase activity with mortality in the US population. *Am J Epidemiol* 2013;**178**:1702–11. doi:10.1093/aje/kwt209
- 8 Koehler EM, Sanna D, Hansen BE, *et al.* Serum liver enzymes are associated with all-cause mortality in an elderly population. *Liver Int Off J Int Assoc Study Liver* 2014;**34**:296–304. doi:10.1111/liv.12311
- 9 Deetman PE, Alkhalaf A, Landman GWD, *et al.* Alanine aminotransferase and mortality in patients with type 2 diabetes (ZODIAC-38). *Eur J Clin Invest* 2015;**45**:807–14. doi:10.1111/eci.12474
- 10 Dong MH, Bettencourt R, Brenner DA, *et al.* Serum levels of alanine aminotransferase decrease with age in longitudinal analysis. *Clin Gastroenterol Hepatol Off Clin Pract J Am Gastroenterol Assoc* 2012;**10**:285-290.e1. doi:10.1016/j.cgh.2011.10.014
- 11 Seong SC, Kim Y-Y, Park SK, *et al.* Cohort profile: the National Health Insurance Service-National Health Screening Cohort (NHIS-HEALS) in Korea. *BMJ Open* 2017;**7**:e016640. doi:10.1136/bmjopen-2017-016640
- 12 Lee G, Choi S, Kim K, *et al.* Association of Hemoglobin Concentration and Its Change With Cardiovascular and All-Cause Mortality. *J Am Heart Assoc* 2018;**7**.

doi:10.1161/JAHA.117.007723

- 13 Shin WY, Lee T, Jeon DH, *et al.* Diabetes, Frequency of Exercise, and Mortality Over 12 Years: Analysis of the National Health Insurance Service-Health Screening (NHIS-HEALS) Database. *J Korean Med Sci* 2018;**33**:e60. doi:10.3346/jkms.2018.33.e60
- 14 Shin WY, Kim HC, Lee T, *et al.* Combined effects of diabetes and low household income on mortality: a 12-year follow-up study of 505 677 Korean adults. *Diabet Med J Br Diabet Assoc* Published Online First: 31 May 2018. doi:10.1111/dme.13695
- 15 Ruhl CE, Everhart JE. Elevated serum alanine aminotransferase and gamma-glutamyltransferase and mortality in the United States population. *Gastroenterology* 2009;**136**:477-485.e11. doi:10.1053/j.gastro.2008.10.052
- 16 Liu Z, Ning H, Que S, *et al.* Complex association between alanine aminotransferase activity and mortality in general population: a systematic review and meta-analysis of prospective studies. *PloS One* 2014;**9**:e91410. doi:10.1371/journal.pone.0091410
- 17 Williams KH, Sullivan DR, Nicholson GC, *et al.* Opposite associations between alanine aminotransferase and  $\gamma$ -glutamyl transferase levels and all-cause mortality in type 2 diabetes: Analysis of the Fenofibrate Intervention and Event Lowering in Diabetes (FIELD) study. *Metabolism* 2016;**65**:783–93. doi:10.1016/j.metabol.2015.12.008
- 18 Dignam JJ, Zhang Q, Kocherginsky M. The use and interpretation of competing risks regression models. *Clin Cancer Res Off J Am Assoc Cancer Res* 2012;**18**:2301–8. doi:10.1158/1078-0432.CCR-11-2097
- 19 Noordzij M, Leffondré K, van Stralen KJ, *et al.* When do we need competing risks methods for survival analysis in nephrology? *Nephrol Dial Transplant Off Publ Eur Dial Transpl Assoc - Eur Ren Assoc* 2013;**28**:2670–7. doi:10.1093/ndt/gft355
- 20 Ford I, Mooijaart SP, Lloyd S, *et al.* The inverse relationship between alanine aminotransferase in the normal range and adverse cardiovascular and non-cardiovascular outcomes. *Int J Epidemiol* 2011;**40**:1530–8. doi:10.1093/ije/dyr172
- 21 Kim HC, Nam CM, Jee SH, *et al.* Normal serum aminotransferase concentration and risk of mortality from liver diseases: prospective cohort study. *BMJ* 2004;**328**:983. doi:10.1136/bmj.38050.593634.63
- 22 Nakamura K, Okamura T, Kanda H, *et al.* The value of combining serum alanine aminotransferase levels and body mass index to predict mortality and medical costs: a 10-year follow-up study of National Health Insurance in Shiga, Japan. *J Epidemiol* 2006;**16**:15–20.
- 23 Ravel V, Streja E, Molnar MZ, *et al.* Association of aspartate aminotransferase with

- 1  
2  
3  
4 mortality in hemodialysis patients. *Nephrol Dial Transplant Off Publ Eur Dial Transpl*  
5 *Assoc - Eur Ren Assoc* 2016;**31**:814–22. doi:10.1093/ndt/gfv310  
6  
7  
8 24 Pinkham CA, Krause KJ. Liver function tests and mortality in a cohort of life insurance  
9 applicants. *J Insur Med N Y N* 2009;**41**:170–7.  
10  
11 25 Goessling W, Massaro JM, Vasan RS, *et al*. Aminotransferase levels and 20-year risk of  
12 metabolic syndrome, diabetes, and cardiovascular disease. *Gastroenterology*  
13 2008;**135**:1935–44, 1944.e1. doi:10.1053/j.gastro.2008.09.018  
14  
15 26 Fulks M, Stout RL, Dolan VF. Using liver enzymes as screening tests to predict mortality  
16 risk. *J Insur Med N Y N* 2008;**40**:191–203.  
17  
18 27 Green RM, Flamm S. AGA technical review on the evaluation of liver chemistry tests.  
19 *Gastroenterology* 2002;**123**:1367–84.  
20  
21 28 Tan JL, Eastment JG, Poudel A, *et al*. Age-Related Changes in Hepatic Function: An Update  
22 on Implications for Drug Therapy. *Drugs Aging* 2015;**32**:999–1008. doi:10.1007/s40266-  
23 015-0318-1  
24  
25  
26 29 Won TY, Kang BS, Im TH, *et al*. The Study of Accuracy of Death Statistics. *J Korean Soc*  
27 *Emerg Med* 2007;**18**:256–62.  
28  
29  
30  
31  
32  
33  
34  
35  
36  
37  
38  
39  
40  
41  
42  
43  
44  
45  
46  
47  
48  
49  
50  
51  
52  
53  
54  
55  
56  
57  
58  
59  
60



**Table 1.** Baseline sociodemographic characteristics and liver enzyme levels of the study participants (2002–2003) ( $n = 484,472$ )

| Characteristics            | Total          | ALT (U/L)      | AST (U/L)      | GGT (U/L)      |
|----------------------------|----------------|----------------|----------------|----------------|
|                            | <i>n</i> (%)   | GM $\pm$ GSD   |                |                |
| Age (years)                |                |                |                |                |
| 40–49                      | 212,004 (43.8) | 21.8 $\pm$ 1.7 | 23.5 $\pm$ 1.4 | 26.1 $\pm$ 2.2 |
| 50–59                      | 140,742 (29.1) | 22.8 $\pm$ 1.6 | 24.9 $\pm$ 1.4 | 26.8 $\pm$ 2.1 |
| 60–69                      | 98,759 (20.4)  | 21.6 $\pm$ 1.6 | 25.4 $\pm$ 1.4 | 24.6 $\pm$ 2.0 |
| 70–80                      | 32,967 (6.8)   | 19.5 $\pm$ 1.6 | 25.2 $\pm$ 1.4 | 21.6 $\pm$ 1.9 |
| Sex                        |                |                |                |                |
| Men                        | 258,010 (53.3) | 25.3 $\pm$ 1.7 | 26.1 $\pm$ 1.5 | 35.8 $\pm$ 2.1 |
| Women                      | 226,462 (46.7) | 18.5 $\pm$ 1.6 | 22.6 $\pm$ 1.4 | 17.6 $\pm$ 1.8 |
| Household income (deciles) |                |                |                |                |
| 0–2                        | 76,994 (15.9)  | 20.8 $\pm$ 1.7 | 24.2 $\pm$ 1.4 | 23.7 $\pm$ 2.1 |
| 3–5                        | 106,260 (21.9) | 21.6 $\pm$ 1.7 | 24.7 $\pm$ 1.5 | 25.1 $\pm$ 2.1 |
| 6–8                        | 139,763 (28.9) | 22.4 $\pm$ 1.7 | 24.7 $\pm$ 1.4 | 26.6 $\pm$ 2.1 |
| 9–10                       | 161,455 (33.3) | 22.2 $\pm$ 1.7 | 24.0 $\pm$ 1.4 | 26.2 $\pm$ 2.1 |
| Smoking status             |                |                |                |                |
| Non-smoker                 | 317,199 (65.5) | 20.5 $\pm$ 1.6 | 23.6 $\pm$ 1.4 | 21.4 $\pm$ 1.9 |
| Ex-smoker                  | 40,797 (8.4)   | 25.4 $\pm$ 1.7 | 25.8 $\pm$ 1.4 | 34.1 $\pm$ 2.0 |

|                         |                |            |            |            |
|-------------------------|----------------|------------|------------|------------|
| Smoker                  | 109,868 (22.7) | 25.0 ± 1.7 | 26.0 ± 1.5 | 39.0 ± 2.1 |
| Missing                 | 16,608 (3.4)   | 22.0 ± 1.7 | 24.6 ± 1.4 | 25.4 ± 2.1 |
| Alcohol consumption     |                |            |            |            |
| None                    | 271,551 (56.1) | 20.4 ± 1.6 | 23.2 ± 1.4 | 20.1 ± 1.8 |
| ≤1–2 times/week         | 151,559 (31.3) | 23.4 ± 1.7 | 24.9 ± 1.4 | 31.4 ± 2.1 |
| ≥3–4 times/week         | 53,350 (11.0)  | 25.9 ± 1.7 | 28.9 ± 1.5 | 51.1 ± 2.3 |
| Missing                 | 8,012 (1.7)    | 20.9 ± 1.6 | 23.5 ± 1.4 | 21.0 ± 1.9 |
| Physical activity       |                |            |            |            |
| Did not exercise        | 270,329 (55.8) | 21.4 ± 1.7 | 24.3 ± 1.4 | 24.5 ± 2.1 |
| ≤1–2 times/week         | 112,413 (23.2) | 23.0 ± 1.7 | 24.5 ± 1.4 | 28.5 ± 2.1 |
| ≥3–4 times/week         | 89,843 (18.5)  | 21.9 ± 1.6 | 24.4 ± 1.4 | 25.9 ± 2.1 |
| Missing                 | 11,887 (2.5)   | 21.7 ± 1.7 | 25.4 ± 1.4 | 25.2 ± 2.1 |
| Body mass index         |                |            |            |            |
| (kg/m <sup>2</sup> )    |                |            |            |            |
| <18.5                   | 10,599 (2.2)   | 17.7 ± 1.6 | 24.6 ± 1.5 | 21.1 ± 2.2 |
| 18.5–22.9               | 171,108 (35.3) | 19.1 ± 1.6 | 23.4 ± 1.4 | 21.9 ± 2.1 |
| 23–24.9                 | 132,394 (27.3) | 21.9 ± 1.6 | 24.0 ± 1.4 | 25.9 ± 2.1 |
| 25–29.9                 | 156,051 (32.2) | 25.1 ± 1.7 | 25.5 ± 1.4 | 30.1 ± 2.1 |
| ≥30                     | 13,926 (2.9)   | 29.0 ± 1.8 | 27.6 ± 1.5 | 32.1 ± 2.1 |
| Missing                 | 394 (0.1)      | 21.4 ± 1.6 | 24.6 ± 1.4 | 22.2 ± 2.0 |
| Systolic blood pressure |                |            |            |            |

(mmHg)

|           |                |            |            |            |
|-----------|----------------|------------|------------|------------|
| <120      | 140,993 (29.1) | 19.7 ± 1.6 | 22.8 ± 1.4 | 21.1 ± 2.0 |
| 120–139.9 | 214,824 (44.3) | 22.3 ± 1.7 | 24.5 ± 1.4 | 26.4 ± 2.1 |
| ≥140      | 128,464 (26.5) | 23.7 ± 1.7 | 26.0 ± 1.5 | 30.4 ± 2.2 |
| Missing   | 191 (0.04)     | 21.1 ± 1.7 | 23.3 ± 1.5 | 24.4 ± 2.0 |

Diastolic blood  
pressure (mmHg)

|         |                |            |            |            |
|---------|----------------|------------|------------|------------|
| <80     | 191,221 (39.5) | 20.1 ± 1.6 | 23.2 ± 1.4 | 21.7 ± 2.0 |
| 80–89.9 | 167,612 (34.6) | 22.4 ± 1.7 | 24.6 ± 1.4 | 26.6 ± 2.1 |
| ≥90     | 125,372 (25.9) | 24.2 ± 1.7 | 26.0 ± 1.5 | 31.5 ± 2.2 |
| Missing | 267 (0.1)      | 21.5 ± 1.7 | 23.4 ± 1.4 | 23.8 ± 2.0 |

Fasting glucose level  
(mg/dL)

|           |                |            |            |            |
|-----------|----------------|------------|------------|------------|
| <70       | 8,510 (1.8)    | 20.3 ± 1.7 | 23.9 ± 1.4 | 23.2 ± 2.0 |
| 70–99.9   | 324,064 (66.9) | 20.9 ± 1.6 | 23.9 ± 1.4 | 23.7 ± 2.0 |
| 100–125.9 | 114,597 (23.7) | 23.6 ± 1.7 | 25.3 ± 1.5 | 29.1 ± 2.2 |
| ≥126      | 37,167 (7.7)   | 26.5 ± 1.7 | 26.1 ± 1.6 | 35.9 ± 2.3 |
| Missing   | 134 (0.03)     | 19.7 ± 1.7 | 22.8 ± 1.7 | 20.7 ± 2.0 |

Past history of heart  
disease

|    |                |            |            |            |
|----|----------------|------------|------------|------------|
| No | 494,401 (98.6) | 21.9 ± 1.7 | 24.4 ± 1.4 | 25.6 ± 2.1 |
|----|----------------|------------|------------|------------|

|                        |                |            |            |            |
|------------------------|----------------|------------|------------|------------|
| Yes                    | 7,187 (1.4)    | 22.4 ± 1.6 | 25.0 ± 1.4 | 26.3 ± 2.0 |
| Past history of stroke |                |            |            |            |
| No                     | 499,352 (99.6) | 21.9 ± 1.7 | 24.4 ± 1.4 | 25.7 ± 2.1 |
| Yes                    | 2,236 (0.5)    | 22.0 ± 1.6 | 24.6 ± 1.4 | 27.4 ± 2.0 |
| Past history of cancer |                |            |            |            |
| No                     | 498,856 (99.5) | 21.9 ± 1.7 | 24.4 ± 1.4 | 25.7 ± 2.1 |
| Yes                    | 2,732 (0.5)    | 20.7 ± 1.6 | 25.0 ± 1.4 | 21.2 ± 1.9 |

---

Abbreviations: ALT, alanine aminotransferase; AST, aspartate aminotransferase; GGT, gamma glutamyltransferase; GM, geometric mean; GSD, geometric standard deviation

**Table 2.** Associations<sup>a</sup> between baseline liver enzyme levels (2002–2003) and all-cause mortality (2008–2013)

| Decile <sup>b</sup> | Levels (U/L) | <i>n</i> (%)  | HR   | 95% CI     | <i>p</i> -value |
|---------------------|--------------|---------------|------|------------|-----------------|
| ALT                 |              |               |      |            |                 |
| 1                   | ≤12          | 56,870 (11.7) | 1.16 | 1.10, 1.23 | <0.0001         |
| 2                   | 13–14        | 41,904 (8.7)  | 1.11 | 1.04, 1.17 | 0.0014          |
| 3                   | 15–16        | 46,115 (9.5)  | 1.07 | 1.01, 1.13 | 0.0292          |
| 4                   | 17–18        | 46,272 (9.6)  | Ref. | Ref.       | Ref.            |
| 5                   | 19–21        | 62,738 (13.0) | 1.06 | 1.01, 1.12 | 0.0320          |
| 6                   | 22–23        | 33,898 (7.0)  | 1.04 | 0.97, 1.11 | 0.2722          |
| 7                   | 24–27        | 54,157 (11.2) | 1.05 | 0.99, 1.11 | 0.1046          |
| 8                   | 28–32        | 46,873 (9.7)  | 1.11 | 1.05, 1.18 | 0.0005          |
| 9                   | 33–42        | 49,009 (10.1) | 1.17 | 1.10, 1.24 | <0.0001         |
| 10                  | ≥43          | 46,601 (9.6)  | 1.53 | 1.44, 1.62 | <0.0001         |
| AST                 |              |               |      |            |                 |
| 1                   | ≤16          | 48,178 (10.0) | 1.15 | 1.07, 1.24 | 0.0001          |
| 2                   | 17–18        | 45,357 (9.4)  | 1.09 | 1.01, 1.18 | 0.0217          |
| 3                   | 19–20        | 58,461 (12.1) | 1.09 | 1.02, 1.17 | 0.0175          |
| 4                   | 21           | 30,304 (6.3)  | Ref. | Ref.       | Ref.            |
| 5                   | 22–23        | 58,761 (12.1) | 1.03 | 0.96, 1.10 | 0.4151          |
| 6                   | 24–25        | 52,190 (10.8) | 1.06 | 0.99, 1.14 | 0.0896          |

|    |       |               |      |            |         |
|----|-------|---------------|------|------------|---------|
| 7  | 26–27 | 41,805 (8.6)  | 1.09 | 1.01, 1.17 | 0.0185  |
| 8  | 28–31 | 58,055 (12.0) | 1.08 | 1.01, 1.15 | 0.0257  |
| 9  | 32–37 | 44,515 (9.2)  | 1.20 | 1.12, 1.28 | <0.0001 |
| 10 | ≥38   | 46,802 (9.7)  | 1.70 | 1.59, 1.81 | <0.0001 |

## GGT

|    |       |               |      |            |         |
|----|-------|---------------|------|------------|---------|
| 1  | ≤11   | 54,316 (11.2) | Ref. | Ref.       | Ref.    |
| 2  | 12–13 | 36,355 (7.5)  | 1.01 | 0.94, 1.08 | 0.7713  |
| 3  | 14–16 | 55,121 (11.4) | 1.07 | 1.00, 1.13 | 0.0412  |
| 4  | 17–19 | 49,756 (10.3) | 1.10 | 1.04, 1.17 | 0.0019  |
| 5  | 20–23 | 53,476 (11.0) | 1.12 | 1.06, 1.19 | 0.0002  |
| 6  | 24–27 | 41,003 (8.5)  | 1.16 | 1.09, 1.24 | <0.0001 |
| 7  | 28–34 | 50,696 (10.5) | 1.24 | 1.17, 1.32 | <0.0001 |
| 8  | 35–45 | 48,116 (9.9)  | 1.31 | 1.23, 1.39 | <0.0001 |
| 9  | 46–71 | 49,144 (10.1) | 1.46 | 1.37, 1.55 | <0.0001 |
| 10 | ≥72   | 46,450 (9.6)  | 2.05 | 1.93, 2.18 | <0.0001 |

Abbreviations: HR, hazard ratio; CI, confidence interval; ALT, alanine aminotransferase; AST, aspartate aminotransferase; GGT, gamma glutamyltransferase

<sup>a</sup>Adjusted for age, sex, household income decile, smoking status, alcohol consumption, physical activity, body mass index, systolic and diastolic blood pressure, fasting glucose levels, and past history of heart disease, stroke, and cancer.

<sup>b</sup>Deciles for baseline levels of alanine aminotransferase, aspartate aminotransferase, and gamma

1  
2  
3  
4  
5  
6  
7  
8  
9  
10  
11  
12  
13  
14  
15  
16  
17  
18  
19  
20  
21  
22  
23  
24  
25  
26  
27  
28  
29  
30  
31  
32  
33  
34  
35  
36  
37  
38  
39  
40  
41  
42  
43  
44  
45  
46  
47  
48  
49  
50  
51  
52  
53  
54  
55  
56  
57  
58  
59  
60

glutamyltransferase

For peer review only

**Table 3.** Associations<sup>a</sup> between changes in liver enzyme levels since the baseline survey (2002–2003) and all-cause mortality (2008–2013)

| Decile <sup>b</sup> | Levels (U/L) | <i>n</i> (%)  | HR   | 95% CI     | <i>p</i> -value |
|---------------------|--------------|---------------|------|------------|-----------------|
| ALT                 |              |               |      |            |                 |
| 1                   | ≤-16         | 28,441 (9.6)  | 1.46 | 1.34, 1.59 | <0.0001         |
| 2                   | -15 to -9    | 29,670 (10.0) | 1.23 | 1.13, 1.34 | <0.0001         |
| 3                   | -8 to -5     | 34,065 (11.4) | 1.11 | 1.02, 1.21 | 0.0137          |
| 4                   | -4 to -3     | 23,295 (7.8)  | 1.08 | 0.98, 1.18 | 0.1334          |
| 5                   | -2 to -1     | 27,637 (9.3)  | 1.12 | 1.03, 1.23 | 0.0127          |
| 6                   | 0–1          | 28,738 (9.7)  | 1.11 | 1.02, 1.22 | 0.0226          |
| 7                   | 2–4          | 38,771 (13.0) | 1.02 | 0.94, 1.12 | 0.5916          |
| 8                   | 5–7          | 27,754 (9.3)  | 1.01 | 0.92, 1.11 | 0.8602          |
| 9                   | 8–13         | 29,713 (10.0) | Ref. | Ref.       | Ref.            |
| 10                  | ≥14          | 29,842 (10.0) | 1.36 | 1.24, 1.48 | <0.0001         |
| AST                 |              |               |      |            |                 |
| 1                   | ≤-12         | 27,631 (9.3)  | 1.53 | 1.38, 1.69 | <0.0001         |
| 2                   | -11 to -7    | 29,839 (10.0) | 1.23 | 1.11, 1.36 | 0.0001          |
| 3                   | -6 to -4     | 33,587 (11.3) | 1.09 | 0.98, 1.21 | 0.1081          |
| 4                   | -3 to -2     | 30,433 (10.2) | 1.15 | 1.03, 1.28 | 0.0113          |
| 5                   | -1 to 0      | 35,094 (11.8) | 1.10 | 0.99, 1.22 | 0.0773          |
| 6                   | 1            | 17,637 (5.9)  | Ref. | Ref.       | Ref.            |



1  
2  
3  
4  
5  
6  
7  
8  
9  
10  
11  
12  
13  
14  
15  
16  
17  
18  
19  
20  
21  
22  
23  
24  
25  
26  
27  
28  
29  
30  
31  
32  
33  
34  
35  
36  
37  
38  
39  
40  
41  
42  
43  
44  
45  
46  
47  
48  
49  
50  
51  
52  
53  
54  
55  
56  
57  
58  
59  
60

|    |      |               |      |            |         |
|----|------|---------------|------|------------|---------|
| 7  | 2–3  | 32,282 (10.8) | 1.02 | 0.92, 1.14 | 0.7010  |
| 8  | 4–6  | 36,128 (12.1) | 1.05 | 0.95, 1.17 | 0.3479  |
| 9  | 7–10 | 26,425 (8.9)  | 1.04 | 0.93, 1.16 | 0.4996  |
| 10 | ≥11  | 28,874 (9.7)  | 1.55 | 1.40, 1.71 | <0.0001 |

## GGT

|    |           |               |      |            |         |
|----|-----------|---------------|------|------------|---------|
| 1  | ≤-19      | 28,402 (9.5)  | 1.67 | 1.52, 1.84 | <0.0001 |
| 2  | -18 to -9 | 28,240 (9.5)  | 1.15 | 1.05, 1.27 | 0.0043  |
| 3  | -8 to -4  | 35,442 (11.9) | 1.09 | 0.99, 1.20 | 0.0931  |
| 4  | -3 to -2  | 22,232 (7.5)  | Ref. | Ref.       | Ref.    |
| 5  | -1 to 1   | 41,200 (13.8) | 1.01 | 0.92, 1.12 | 0.7703  |
| 6  | 2–3       | 26,555 (8.9)  | 1.00 | 0.90, 1.12 | 0.9599  |
| 7  | 4–6       | 31,623 (10.6) | 1.10 | 1.00, 1.21 | 0.0602  |
| 8  | 7–10      | 26,769 (9.0)  | 1.07 | 0.96, 1.18 | 0.2187  |
| 9  | 11–20     | 28,416 (9.5)  | 1.22 | 1.11, 1.35 | <0.0001 |
| 10 | ≥21       | 29,297 (9.8)  | 1.71 | 1.56, 1.88 | <0.0001 |

Abbreviations: HR, hazard ratio; CI, confidence interval; ALT, alanine aminotransferase; AST, aspartate aminotransferase; GGT, gamma glutamyltransferase

<sup>a</sup>Adjusted for age, sex, household income decile, smoking status, alcohol consumption, physical activity, body mass index, systolic and diastolic blood pressure, fasting glucose levels, and past history of heart disease, stroke, and cancer.

<sup>b</sup>Deciles for changes in levels of alanine aminotransferase, aspartate aminotransferase, and

1  
2  
3  
4 gamma glutamyltransferase during the 4 years since the baseline survey  
5  
6  
7  
8  
9  
10  
11  
12  
13  
14  
15  
16  
17  
18  
19  
20  
21  
22  
23  
24  
25  
26  
27  
28  
29  
30  
31  
32  
33  
34  
35  
36  
37  
38  
39  
40  
41  
42  
43  
44  
45  
46  
47  
48  
49  
50  
51  
52  
53  
54  
55  
56  
57  
58  
59  
60

For peer review only

## Figure Legends

**Figure 1.** Schematic representation of the study design and period.

**Figure 2.** Associations<sup>a</sup> between the deciles of changes in liver enzyme levels over a 4-year period and all-cause mortality, stratified by the median value of each baseline liver enzyme level.

Abbreviations: ALT, alanine aminotransferase; AST, aspartate aminotransferase; GGT, gamma glutamyltransferase

<sup>a</sup>Hazard ratios were estimated using Cox proportional hazard models adjusted for age, sex, household income decile, smoking status, alcohol consumption, physical activity, body mass index, systolic and diastolic blood pressure, fasting glucose levels, and past history of heart disease, stroke, and cancer.

1  
2  
3  
4  
5  
6  
7  
8  
9  
10  
11  
12  
13  
14  
15  
16  
17  
18  
19  
20  
21  
22  
23  
24  
25  
26  
27  
28  
29  
30  
31  
32  
33  
34  
35  
36  
37  
38  
39  
40  
41  
42  
43  
44  
45  
46  
47  
48  
49  
50  
51  
52  
53  
54  
55  
56  
57  
58  
59  
60

| Year                                    | 2002                                                                              | 2003 | 2004                                                                              | 2005 | 2006 | 2007 | 2008 | 2009 | 2010 | 2011 | 2012 | 2013 |
|-----------------------------------------|-----------------------------------------------------------------------------------|------|-----------------------------------------------------------------------------------|------|------|------|------|------|------|------|------|------|
| Exposure 1:<br>Baseline Liver<br>Enzyme |                                                                                   |      |                                                                                   |      |      |      |      |      |      |      |      |      |
| Exposure 2:<br>Liver Enzyme<br>Change   |  |      |  |      |      |      |      |      |      |      |      |      |
| Outcome:<br>Mortality                   |                                                                                   |      |                                                                                   |      |      |      |      |      |      |      |      |      |

Figure 1

338x190mm (300 x 300 DPI)

1  
2  
3  
4  
5  
6  
7  
8  
9  
10  
11  
12  
13  
14  
15  
16  
17  
18  
19  
20  
21  
22  
23  
24  
25  
26  
27  
28  
29  
30  
31  
32  
33  
34  
35  
36  
37  
38  
39  
40  
41  
42  
43  
44  
45  
46  
47  
48  
49  
50  
51  
52  
53  
54  
55  
56  
57  
58  
59  
60

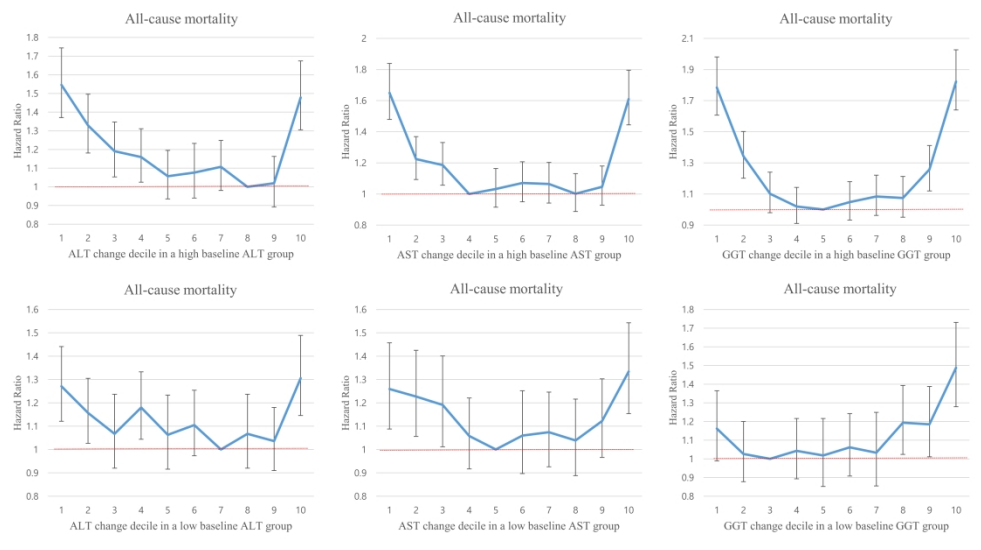

Figure 2

338x190mm (300 x 300 DPI)

1  
2  
3  
4 **Associations of serum liver enzyme levels and their changes over time with all-cause and**  
5 **cause-specific mortality in the general population: a large-scale national health screening**  
6 **cohort study**  
7  
8  
9

10  
11  
12  
13  
14  
15 Kyoung-Nam Kim, Jungmin Joo, Ho Kyung Sung, Chee Hae Kim, Haebin Kim, and Yong-Jin  
16  
17 Kwon  
18  
19  
20  
21  
22

23 **Table of Contents:**  
24  
25

26 **Supplementary Figure 1.** Associations between deciles of changes in liver enzyme levels over a  
27  
28 4-year period and all-cause mortality, stratified by the quartiles of each baseline liver enzyme  
29  
30 levels.  
31  
32

33 **Supplementary Figure 2.** Associations between deciles of the baseline liver enzyme levels and  
34  
35 cause-specific mortality.  
36  
37

38 **Supplementary Figure 3.** Associations between deciles of changes in liver enzyme levels over a  
39  
40 4-year period and cause-specific mortality.  
41  
42  
43  
44  
45  
46  
47  
48  
49  
50  
51  
52  
53  
54

## Figure Legends

**Supplementary Figure 1.** Associations<sup>a</sup> between deciles of changes in liver enzyme levels over a 4-year period and all-cause mortality, stratified by the quartiles of each baseline liver enzyme levels.

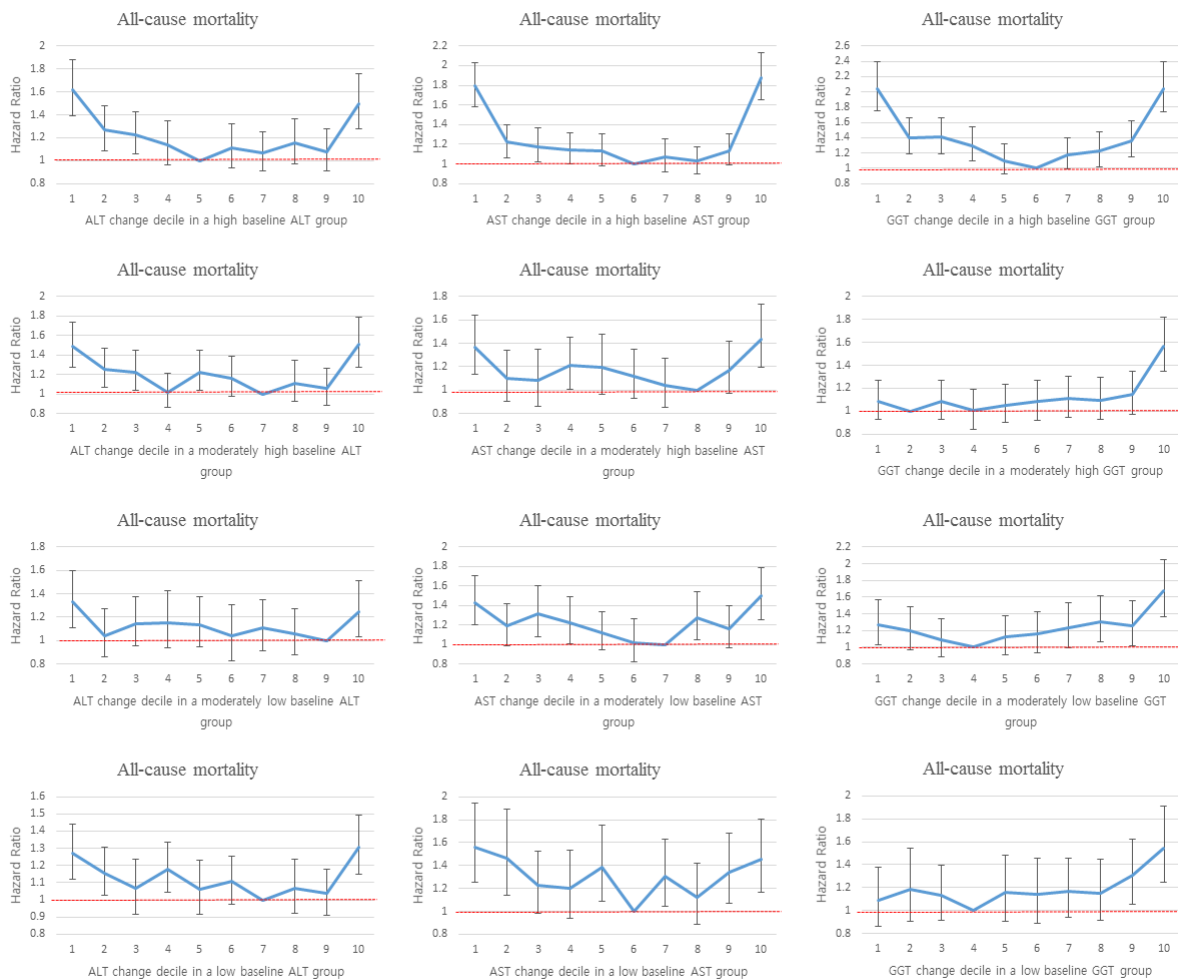

Abbreviations: ALT, alanine aminotransferase; AST, aspartate aminotransferase; GGT, gamma glutamyltransferase

1  
2  
3  
4 <sup>a</sup>Hazard ratios were estimated using Cox proportional hazard models adjusted for age, sex,  
5  
6 household income decile, smoking status, alcohol consumption, physical activity, body mass  
7  
8 index, systolic and diastolic blood pressure, fasting glucose levels, and past history of heart  
9  
10 disease, stroke, and cancer.  
11  
12  
13  
14  
15  
16  
17  
18  
19  
20  
21  
22  
23  
24  
25  
26  
27  
28  
29  
30  
31  
32  
33  
34  
35  
36  
37  
38  
39  
40  
41  
42  
43  
44  
45  
46  
47  
48  
49  
50  
51  
52  
53  
54



**Supplementary Figure 2.** Associations<sup>a</sup> between deciles of the baseline liver enzyme levels and cause-specific mortality.

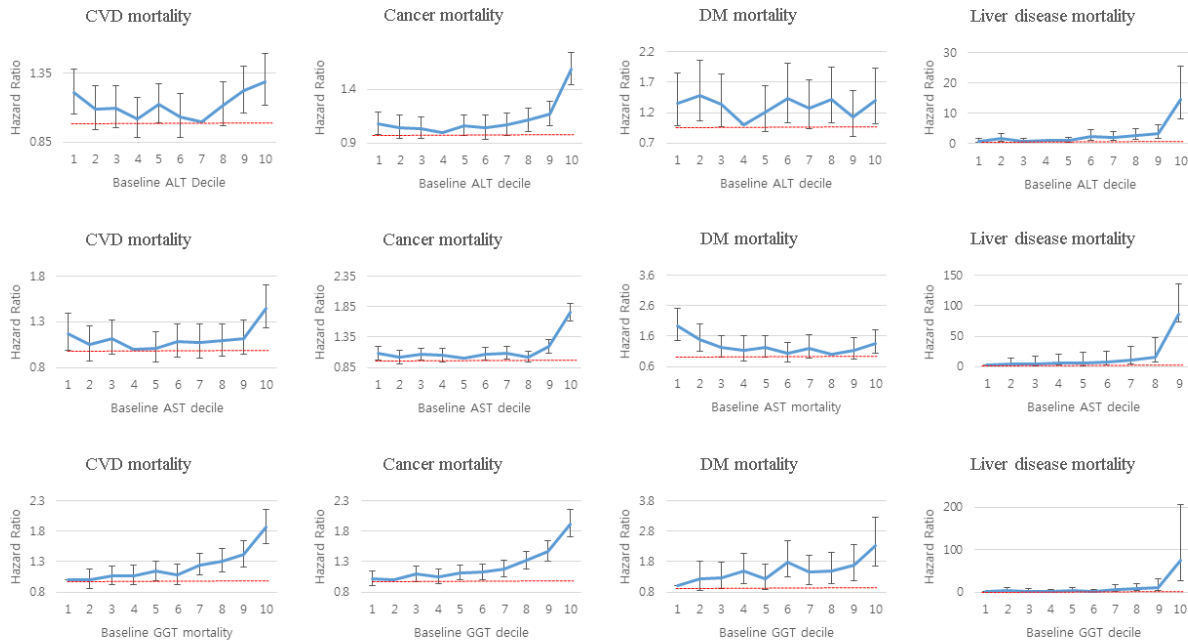

Abbreviations: ALT, alanine aminotransferase; AST, aspartate aminotransferase; GGT, gamma glutamyltransferase

<sup>a</sup>Hazard ratios were estimated using cause-specific proportional hazard models adjusted for age, sex, household income decile, smoking status, alcohol consumption, physical activity, body mass index, systolic and diastolic blood pressure, fasting glucose levels, and past history of heart disease, stroke, and cancer.

**Supplementary Figure 3.** Associations<sup>a</sup> between deciles of changes in liver enzyme levels over a 4-year period and cause-specific mortality.

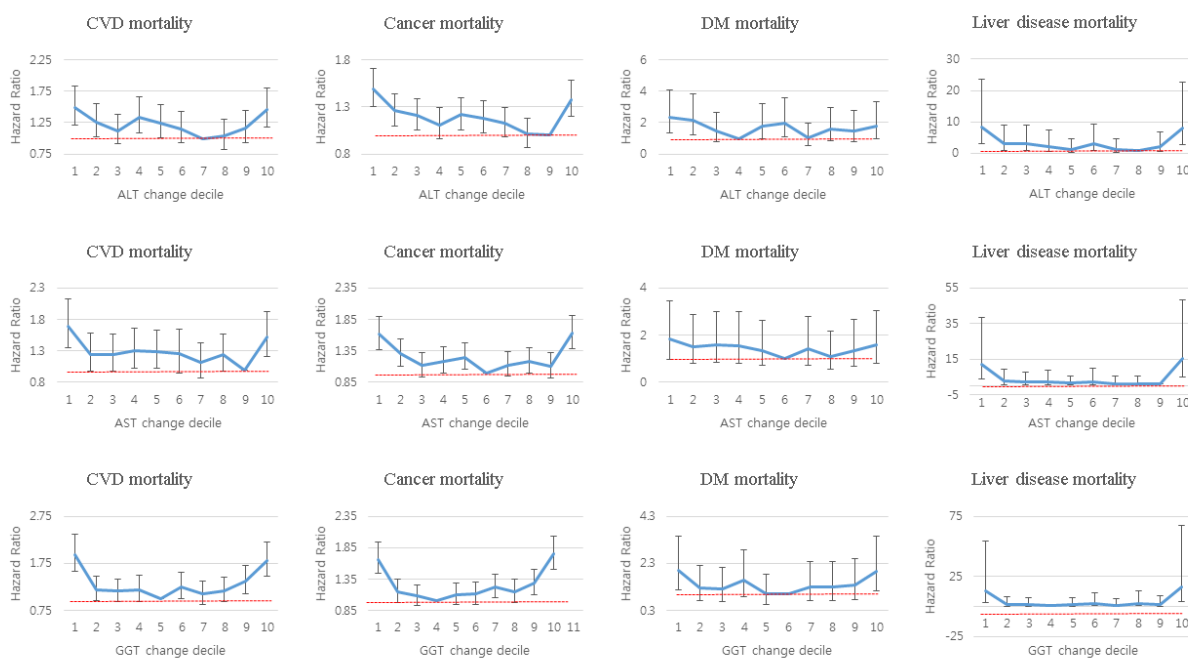

Abbreviations: ALT, alanine aminotransferase; AST, aspartate aminotransferase; GGT, gamma glutamyltransferase

<sup>a</sup>Hazard ratios were estimated using cause-specific proportional hazard models adjusted for age, sex, household income decile, smoking status, alcohol consumption, physical activity, body mass index, systolic and diastolic blood pressure, fasting glucose levels, and past history of heart disease, stroke, and cancer.

## STROBE Statement—checklist of items that should be included in reports of observational studies

|                              | Item No | Recommendation                                                                                                                                                                                                                                                                                                                                                                                                                                                         | Page No |
|------------------------------|---------|------------------------------------------------------------------------------------------------------------------------------------------------------------------------------------------------------------------------------------------------------------------------------------------------------------------------------------------------------------------------------------------------------------------------------------------------------------------------|---------|
| <b>Title and abstract</b>    | 1       | (a) Indicate the study's design with a commonly used term in the title or the abstract                                                                                                                                                                                                                                                                                                                                                                                 | 1       |
|                              |         | (b) Provide in the abstract an informative and balanced summary of what was done and what was found                                                                                                                                                                                                                                                                                                                                                                    | 3       |
| <b>Introduction</b>          |         |                                                                                                                                                                                                                                                                                                                                                                                                                                                                        |         |
| Background/rationale         | 2       | Explain the scientific background and rationale for the investigation being reported                                                                                                                                                                                                                                                                                                                                                                                   | 5       |
| Objectives                   | 3       | State specific objectives, including any prespecified hypotheses                                                                                                                                                                                                                                                                                                                                                                                                       | 5, 6    |
| <b>Methods</b>               |         |                                                                                                                                                                                                                                                                                                                                                                                                                                                                        |         |
| Study design                 | 4       | Present key elements of study design early in the paper                                                                                                                                                                                                                                                                                                                                                                                                                | 6       |
| Setting                      | 5       | Describe the setting, locations, and relevant dates, including periods of recruitment, exposure, follow-up, and data collection                                                                                                                                                                                                                                                                                                                                        | 6, 7    |
| Participants                 | 6       | (a) <i>Cohort study</i> —Give the eligibility criteria, and the sources and methods of selection of participants. Describe methods of follow-up<br><i>Case-control study</i> —Give the eligibility criteria, and the sources and methods of case ascertainment and control selection. Give the rationale for the choice of cases and controls<br><i>Cross-sectional study</i> —Give the eligibility criteria, and the sources and methods of selection of participants | 6, 7    |
|                              |         | (b) <i>Cohort study</i> —For matched studies, give matching criteria and number of exposed and unexposed<br><i>Case-control study</i> —For matched studies, give matching criteria and the number of controls per case                                                                                                                                                                                                                                                 |         |
| Variables                    | 7       | Clearly define all outcomes, exposures, predictors, potential confounders, and effect modifiers. Give diagnostic criteria, if applicable                                                                                                                                                                                                                                                                                                                               | 8       |
| Data sources/<br>measurement | 8*      | For each variable of interest, give sources of data and details of methods of assessment (measurement). Describe comparability of assessment methods if there is more than one group                                                                                                                                                                                                                                                                                   | 8       |
| Bias                         | 9       | Describe any efforts to address potential sources of bias                                                                                                                                                                                                                                                                                                                                                                                                              | 9, 10   |
| Study size                   | 10      | Explain how the study size was arrived at                                                                                                                                                                                                                                                                                                                                                                                                                              | 7       |
| Quantitative variables       | 11      | Explain how quantitative variables were handled in the analyses. If applicable, describe which groupings were chosen and why                                                                                                                                                                                                                                                                                                                                           | 9       |
| Statistical methods          | 12      | (a) Describe all statistical methods, including those used to control for confounding                                                                                                                                                                                                                                                                                                                                                                                  | 9, 10   |
|                              |         | (b) Describe any methods used to examine subgroups and interactions                                                                                                                                                                                                                                                                                                                                                                                                    | 10      |
|                              |         | (c) Explain how missing data were addressed                                                                                                                                                                                                                                                                                                                                                                                                                            | 9       |
|                              | 6       | (d) <i>Cohort study</i> —If applicable, explain how loss to follow-up was addressed<br><i>Case-control study</i> —If applicable, explain how matching of cases and controls was addressed<br><i>Cross-sectional study</i> —If applicable, describe analytical methods taking account of sampling strategy                                                                                                                                                              |         |
|                              |         | (e) Describe any sensitivity analyses                                                                                                                                                                                                                                                                                                                                                                                                                                  | 10      |

Continued on next page

| <b>Results</b>           |     |                                                                                                                                                                                                              |                |
|--------------------------|-----|--------------------------------------------------------------------------------------------------------------------------------------------------------------------------------------------------------------|----------------|
| Participants             | 13* | (a) Report numbers of individuals at each stage of study—eg numbers potentially eligible, examined for eligibility, confirmed eligible, included in the study, completing follow-up, and analysed            | 7              |
|                          |     | (b) Give reasons for non-participation at each stage                                                                                                                                                         | 7              |
|                          |     | (c) Consider use of a flow diagram                                                                                                                                                                           |                |
| Descriptive data         | 14* | (a) Give characteristics of study participants (eg demographic, clinical, social) and information on exposures and potential confounders                                                                     | 11             |
|                          |     | (b) Indicate number of participants with missing data for each variable of interest                                                                                                                          | 23, 24         |
|                          |     | (c) <i>Cohort study</i> —Summarise follow-up time (eg, average and total amount)                                                                                                                             | 6              |
| Outcome data             | 15* | <i>Cohort study</i> —Report numbers of outcome events or summary measures over time                                                                                                                          | 11, 12         |
|                          |     | <i>Case-control study</i> —Report numbers in each exposure category, or summary measures of exposure                                                                                                         |                |
|                          |     | <i>Cross-sectional study</i> —Report numbers of outcome events or summary measures                                                                                                                           |                |
| Main results             | 16  | (a) Give unadjusted estimates and, if applicable, confounder-adjusted estimates and their precision (eg, 95% confidence interval). Make clear which confounders were adjusted for and why they were included | 11, 12         |
|                          |     | (b) Report category boundaries when continuous variables were categorized                                                                                                                                    | 26, 27, 29, 30 |
|                          |     | (c) If relevant, consider translating estimates of relative risk into absolute risk for a meaningful time period                                                                                             |                |
| Other analyses           | 17  | Report other analyses done—eg analyses of subgroups and interactions, and sensitivity analyses                                                                                                               | 12             |
| <b>Discussion</b>        |     |                                                                                                                                                                                                              |                |
| Key results              | 18  | Summarise key results with reference to study objectives                                                                                                                                                     | 13             |
| Limitations              | 19  | Discuss limitations of the study, taking into account sources of potential bias or imprecision. Discuss both direction and magnitude of any potential bias                                                   | 15             |
| Interpretation           | 20  | Give a cautious overall interpretation of results considering objectives, limitations, multiplicity of analyses, results from similar studies, and other relevant evidence                                   | 16             |
| Generalisability         | 21  | Discuss the generalisability (external validity) of the study results                                                                                                                                        | 15             |
| <b>Other information</b> |     |                                                                                                                                                                                                              |                |
| Funding                  | 22  | Give the source of funding and the role of the funders for the present study and, if applicable, for the original study on which the present article is based                                                | 16             |

\*Give information separately for cases and controls in case-control studies and, if applicable, for exposed and unexposed groups in cohort and cross-sectional studies.

**Note:** An Explanation and Elaboration article discusses each checklist item and gives methodological background and published examples of transparent reporting. The STROBE checklist is best used in conjunction with this article (freely available on the Web sites of PLoS Medicine at <http://www.plosmedicine.org/>, Annals of Internal Medicine at <http://www.annals.org/>, and Epidemiology at <http://www.epidem.com/>). Information on the STROBE Initiative is available at [www.strobe-statement.org](http://www.strobe-statement.org).

# BMJ Open

## Associations of serum liver enzyme levels and their changes over time with all-cause and cause-specific mortality in the general population: a large-scale national health screening cohort study

|                                 |                                                                                                                                                                                                                                                                                                                                                                                                                                                                                                                                                                                                                                               |
|---------------------------------|-----------------------------------------------------------------------------------------------------------------------------------------------------------------------------------------------------------------------------------------------------------------------------------------------------------------------------------------------------------------------------------------------------------------------------------------------------------------------------------------------------------------------------------------------------------------------------------------------------------------------------------------------|
| Journal:                        | <i>BMJ Open</i>                                                                                                                                                                                                                                                                                                                                                                                                                                                                                                                                                                                                                               |
| Manuscript ID                   | bmjopen-2018-026965.R1                                                                                                                                                                                                                                                                                                                                                                                                                                                                                                                                                                                                                        |
| Article Type:                   | Research                                                                                                                                                                                                                                                                                                                                                                                                                                                                                                                                                                                                                                      |
| Date Submitted by the Author:   | 05-Mar-2019                                                                                                                                                                                                                                                                                                                                                                                                                                                                                                                                                                                                                                   |
| Complete List of Authors:       | Kim, Kyoung-Nam; Seoul National University Hospital, Division of Public Health and Preventive Medicine<br>Joo, Jungmin; Seoul National University Hospital, Division of Public Health and Preventive Medicine<br>Sung, Ho Kyung; Seoul National University Hospital, Division of Public Health and Preventive Medicine<br>Kim, Chee Hae; Seoul National University Hospital, Division of Public Health and Preventive Medicine<br>Kim, Haebin; Seoul National University Hospital, Division of Public Health and Preventive Medicine<br>Kwon, Yong Jin; Seoul National University Hospital, Division of Public Health and Preventive Medicine |
| <b>Primary Subject Heading</b>: | Epidemiology                                                                                                                                                                                                                                                                                                                                                                                                                                                                                                                                                                                                                                  |
| Secondary Subject Heading:      | Public health, General practice / Family practice                                                                                                                                                                                                                                                                                                                                                                                                                                                                                                                                                                                             |
| Keywords:                       | Alanine aminotransferase, aspartate aminotransferase, gamma glutamyltransferase, mortality, non-linear associations                                                                                                                                                                                                                                                                                                                                                                                                                                                                                                                           |
|                                 |                                                                                                                                                                                                                                                                                                                                                                                                                                                                                                                                                                                                                                               |

SCHOLARONE™  
Manuscripts

1  
2  
3  
4 **Associations of serum liver enzyme levels and their changes over time with all-cause and**  
5 **cause-specific mortality in the general population: a large-scale national health screening**  
6 **cohort study**  
7  
8  
9

10  
11  
12  
13  
14  
15 Kyoung-Nam Kim,<sup>1,2</sup> Jungmin Joo,<sup>1</sup> Ho Kyung Sung,<sup>1</sup> Chee Hae Kim,<sup>1</sup> Haebin Kim,<sup>1</sup> Yong Jin  
16 Kwon<sup>1,3</sup>  
17  
18  
19  
20  
21  
22

23 <sup>1</sup>Division of Public Health and Preventive Medicine, Seoul National University Hospital, Seoul,  
24 Republic of Korea  
25  
26  
27

28 <sup>2</sup>Department of Preventive Medicine, Seoul National University College of Medicine, Seoul,  
29 Republic of Korea  
30  
31  
32

33 <sup>3</sup>Department of Forensic Medicine, Seoul National University College of Medicine, Seoul,  
34 Republic of Korea  
35  
36  
37  
38  
39  
40  
41

42 **Correspondence to**  
43

44 Yong Jin Kwon, MD, PhD  
45  
46  
47

48 Division of Public Health and Preventive Medicine, Seoul National University Hospital  
49

50 101, Daehak-Ro Jongno-Gu, Seoul 03080, Republic of Korea  
51  
52  
53  
54

1  
2  
3  
4 Tel.: +82 2 2072 0373; Fax: +82 2 2072 0374; Email: [301kwon@snuh.org](mailto:301kwon@snuh.org)  
5  
6

7 Manuscript word count: 2,800 words  
8  
9  
10  
11  
12  
13  
14  
15  
16  
17  
18  
19  
20  
21  
22  
23  
24  
25  
26  
27  
28  
29  
30  
31  
32  
33  
34  
35  
36  
37  
38  
39  
40  
41  
42  
43  
44  
45  
46  
47  
48  
49  
50  
51  
52  
53  
54

For peer review only

## ABSTRACT

**Objectives** To investigate the associations of the levels of liver enzymes such as alanine aminotransferase (ALT), aspartate aminotransferase (AST), and gamma glutamyltransferase (GGT) at baseline and their changes over time with mortality.

**Design** Cohort study.

**Setting, participants, and outcome measures** We analyzed the data of 484,472 individuals from the National Health Insurance Service-National Health Screening cohort (2002–2013). We used two exposure indices: 1) deciles of baseline ALT, AST, and GGT levels measured in 2002 or 2003 and 2) deciles of changes in ALT, AST, and GGT levels over a 4-year period (2002–2006 or 2003–2007). We constructed Cox models to evaluate the associations of these exposure indices with mortality (2008–2013).

**Results** We found non-monotonic dose-response associations between the baseline levels of ALT and AST and all-cause mortality. We also found a monotonic non-linear association between the baseline levels of GGT and all-cause mortality (10<sup>th</sup> decile: hazard ratio [HR] = 2.05, 95% confidence interval [CI]: 1.93, 2.18). Compared with the 9<sup>th</sup>, 6<sup>th</sup>, and 4<sup>th</sup> deciles of changes in ALT (8–13 U/L), AST (1 U/L), and GGT (-3 to -2 U/L) over time, respectively, the risks of all-cause mortality increased in both the higher and lower deciles of changes in the corresponding liver enzyme levels (10<sup>th</sup> decile: HR = 1.36, 95% CI: 1.24, 1.48, 1<sup>st</sup> decile: HR = 1.46, 95% CI: 1.34, 1.59 for ALT; 10<sup>th</sup> decile: HR = 1.55, 95% CI: 1.40, 1.71, 1<sup>st</sup> decile: HR = 1.53, 95% CI: 1.38, 1.69 for AST; 10<sup>th</sup> decile: HR = 1.71, 95% CI: 1.56, 1.88, 1<sup>st</sup> decile: HR = 1.67, 95% CI: 1.52, 1.84 for GGT). These non-monotonic dose-response associations remained when



1  
2  
3  
4 analyses were stratified by the medians or quartiles of the baseline liver enzyme levels.  
5  
6

7 **Conclusions** The levels of liver enzymes at baseline and over time showed non-linear  
8  
9 associations with mortality.  
10  
11

### 12 **Key words**

13  
14  
15 Alanine aminotransferase, aspartate aminotransferase, gamma glutamyltransferase, mortality,  
16  
17 non-linear associations  
18  
19  
20  
21  
22  
23  
24  
25  
26  
27  
28  
29  
30  
31  
32  
33  
34  
35  
36  
37  
38  
39  
40  
41  
42  
43  
44  
45  
46  
47  
48  
49  
50  
51  
52  
53  
54

## Article Summary

### Strengths and limitations of this study

- First study to report non-monotonic dose-response associations between changes in liver enzyme levels over time and mortality.
- Conducted longitudinal analyses using a large-scale cohort constructed from national administration data, which has a negligible follow-up loss.
- Identified the dates and causes of death using a national database maintained by Statistics Korea, which covers all individuals residing in the Republic of Korea and has high accuracy (>90%).
- Information on albumin, alkaline phosphatase, and conjugated and unconjugated bilirubin levels was not available, and information on sociodemographic factors, lifestyles, past medical histories, and family histories was insufficient.
- Could not identify the mechanisms underlying the association between liver enzyme levels and mortality.

## INTRODUCTION

Serum levels of liver enzymes such as alanine aminotransferase (ALT), aspartate aminotransferase (AST), and gamma glutamyltransferase (GGT) are highly sensitive to liver dysfunction and damage.[1] Because assays for these liver enzymes are cost-effective, they are widely used during general health check-ups worldwide.[2,3]

Although liver enzyme levels have been associated with various health outcomes such as cardiovascular diseases,[4] type 2 diabetes mellitus,[5] and cancer,[6] the associations between liver enzyme levels and mortality in the general population remained unclear. Previous studies reported positive, null, and inverse associations between liver enzyme levels and mortality in the general population (reviewed by Kunstor et al.[3]). The association between liver enzyme levels and mortality might not be linear, and both higher and lower liver enzyme levels would be associated with higher mortality (i.e., non-monotonic dose-response associations). Although we expected the non-monotonic dose-response associations between liver enzyme levels and mortality, this possibility has only been investigated in limited number of studies.[3,7,8]

Liver enzyme levels can increase due to factors such as liver damage and injury and can decrease due to factors such as hepatic aging, frailty, and reduced hepatic blood circulation.[9,10]

Therefore, changes (increases or decreases) in the levels of these enzymes over time may be associated with higher mortality independent of baseline liver enzyme levels. However, to our knowledge, no study has explored the possibility of non-monotonic dose-response associations between changes in liver enzyme levels over time and mortality.

Therefore, in the present study, we hypothesized that not only higher baseline liver enzyme

1  
2  
3  
4 levels but also lower baseline levels are associated with higher mortality. In addition, we  
5  
6 hypothesized that the increase or decrease in liver enzyme levels over time is also associated  
7  
8 with higher mortality independent of baseline liver enzyme levels. We evaluated these  
9  
10 hypotheses using a longitudinal study design with a large-scale ( $n > 500,000$ ) national health  
11  
12 screening cohort in which serum liver enzyme levels were repeatedly measured.  
13  
14  
15  
16  
17  
18

## 19 **METHODS**

### 20 **Study population**

21  
22  
23  
24  
25 The present study used data from the National Health Insurance Service-National Health  
26  
27 Screening Cohort (NHIS-HEALS) of the Republic of Korea. Detailed information on the NHIS-  
28  
29 HEALS has been presented elsewhere.[11] Briefly, the NHIS-HEALS is a de-identified cohort  
30  
31 released to researchers by the NHIS for the purpose of public research. Several epidemiological  
32  
33 studies have been published using this data.[12–14] The NHIS-HEALS contains the data of  
34  
35 514,866 individuals, representing a 10% random sample of all participants in the National Health  
36  
37 Screening Program between 2002 and 2003 (data collected during this period comprise the  
38  
39 baseline) who were followed up to December 31, 2013. In the Republic of Korea, all individuals  
40  
41 aged  $\geq 40$  years are invited to participate at least every 2 year in this general, free-of-charge  
42  
43 health screening program conducted at designated healthcare institutions that meet the quality  
44  
45 standards set by the Framework Act on Health Examinations. The rate of participation in the  
46  
47 National Health Screening Program was 43.2% in 2003, and increased gradually to 74.8% in  
48  
49 2014.[14] The prevalence rates of common diseases such as hypertension and type 2 diabetes  
50  
51  
52  
53  
54

1  
2  
3  
4 mellitus in the NHIS-HEALS are generally similar to those reported in a nationally  
5  
6 representative sample.[11]  
7

8  
9 The NHIS-HEALS includes various types of information, such as sociodemographic factors,  
10  
11 lifestyles, past medical histories, and family histories (collected from self-reported questionnaires  
12  
13 during the national health screening), health screening results (from physical examinations and  
14  
15 clinical laboratory tests during the national health screening), healthcare usage (from claims  
16  
17 data), and dates and causes of death (from Statistics Korea).  
18  
19

20  
21 In the present study, from a total of 514,866 individuals included in the NHIS-HEALS, we  
22  
23 sequentially excluded those who died between 2002 and 2007 ( $n = 13,278$ , 2.6%), those without  
24  
25 any liver enzyme data between 2002 and 2003 ( $n = 494$ , 0.1%), and those with hepatitis or  
26  
27 chronic liver disease up to 2007 ( $n = 16,622$ , 3.2%). Therefore, 484,472 individuals (94.1%)  
28  
29 were included in the final analysis. The Institutional Review Board (IRB) of Seoul National  
30  
31 University Hospital reviewed and approved the study protocol (IRB no. E-1804-045-936).  
32  
33 Because the present study used claims data released to researchers after de-identification process,  
34  
35 which is performed by the NHIS, the IRB of Seoul National University Hospital waived the  
36  
37 requirement of informed consent for study participation. All experiments were conducted in  
38  
39 accordance with the relevant guidelines and regulations.  
40  
41  
42  
43  
44  
45  
46  
47

#### 48 Patient and public involvement

49

50  
51 Patients were not recruited or involved in this study.  
52  
53  
54

## Exposures

We used two exposure indices: 1) deciles of the baseline levels of ALT, AST, and GGT measured in 2002 or 2003 and 2) deciles of changes in the ALT, AST, and GGT levels over a 4-year period (2002–2006 or 2003–2007) (figure 1). The first exposure index was used in an analysis of the association between baseline liver enzyme levels and mortality, while the second was used in an analysis of the association between changes in liver enzyme levels and mortality. If both the earlier and later exposure indices were available, the latter (baseline liver enzyme levels in 2003 or changes in liver enzyme levels between 2003 and 2007) was assigned as the exposure index for each individual.

## Outcomes

The outcomes of the present study were all-cause and cause-specific mortality occurring between January 1, 2008 and December 31, 2013 (figure 1). Information on the dates and causes of death was obtained from Statistics Korea and merged with other data by the NHIS via personal identification numbers. The various causes of death were coded according to the International Classification of Disease, 10<sup>th</sup> Revision (ICD-10). For this analysis, we considered deaths from cardiovascular disease (defined as ICD-10 codes I20–I25, I50, and I60–I70), cancer (C00–C97), diabetes mellitus (E10–E14), and liver disease (B15–B19 and K70–K77), according to previous studies.[7,8,15]

## Covariates

Based on previous reports and existing biomedical knowledge,[3,7–9,15–17] we identified the following potential confounders and included them as covariates for further analyses: age (years), sex, household income (decile), smoking status (non-smoker, ex-smoker, or smoker), alcohol consumption (none,  $\leq 1$ –2, or  $\geq 3$ –4 times/week), physical activity (did not exercise,  $\leq 1$ –2, or  $\geq 3$ –4 times/week), body mass index ( $< 18.5$ , 18.5–22.9, 23–24.9, 25–29.9, or  $\geq 30$  kg/m<sup>2</sup>), systolic blood pressure ( $< 120$ , 120–139.9, or  $\geq 140$  mmHg), diastolic blood pressure ( $< 80$ , 80–89.9, or  $\geq 90$  mmHg), fasting glucose levels ( $< 70$ , 70–99.9, 100–125.9, or  $\geq 126$  mmHg), history of heart disease (yes or no), history of stroke (yes or no), and history of cancer (yes or no). Information about these variables was collected from the National Health Screening Program at baseline (2002–2003). We created a missing indicator category for the missing values (0.03–3.4%) of the categorical variables (table 1).

## Statistical analysis

We constructed Cox proportional hazard models adjusted for the above-mentioned covariates to investigate the associations of exposure indices (deciles of baseline liver enzyme levels and deciles of changes in liver enzyme levels) with all-cause mortality. Since the associations between changes in liver enzyme levels and mortality may differ according to the baseline liver enzyme levels, we also divided the study population into those with values above and below the

1  
2  
3  
4 medians or quartiles of the baseline levels of ALT, AST, and GGT. We then assessed the  
5  
6 associations between deciles of changes in the liver enzyme levels and all-cause mortality in  
7  
8 each stratum.  
9

10  
11 We evaluated the non-linearity of the associations (non-monotonic dose-response or monotonic  
12  
13 non-linear associations) by 1) visually inspecting the shapes of the associations in the analysis  
14  
15 using categorized exposure indices and 2) testing the squared-terms of the log<sub>2</sub>-transformed  
16  
17 continuous baseline or changes in liver enzyme levels that were added to Cox models including  
18  
19 the log<sub>2</sub>-transformed baseline or changes in liver enzyme levels and the same covariates.  
20  
21

22  
23  
24 To evaluate the associations of deciles of the baseline and changes in liver enzyme levels with  
25  
26 cause-specific mortality (i.e., deaths from cardiovascular disease, cancer, diabetes mellitus, and  
27  
28 liver disease), we constructed cause-specific proportional hazard models adjusted for the same  
29  
30 covariates. In these competing risk analyses, we estimated cause-specific hazards rather than  
31  
32 sub-distribution hazards, because the hazard ratios (HRs) from cause-specific proportional  
33  
34 hazard models would be easily interpretable and could be used to draw public health  
35  
36 implications.[18,19]  
37  
38

39  
40 In a sensitivity analysis, because distributions of liver enzyme levels were different by sex (U/L,  
41  
42 ALT: median, 25, interquartile range [IQR], 16 among men; median, 18, IQR, 10 among women;  
43  
44 AST: median, 25, IQR, 11 among men; median, 22, IQR, 9 among women; GGT: median, 33,  
45  
46 IQR, 34 among men; median, 16, IQR, 12 among women), we repeated all analyses using sex-  
47  
48 specific cut-off points for deciles of the baseline liver enzyme levels and changes in liver enzyme  
49  
50 levels, instead of the above mentioned sex-non-specific cut-off points, to confirm the robustness  
51  
52  
53  
54



1  
2  
3  
4 of the results.[7] Detailed information on the sex-specific cut-off points is presented in the  
5  
6 Supplementary Material. In addition, we also conducted analyses further excluding individuals  
7  
8 with a history of cancer, history of type 2 diabetes mellitus, and those who drank alcohol  $\geq 3$ –4  
9  
10 times/week, because these conditions can also impact liver enzyme levels.  
11  
12

13  
14 In both the Cox and cause-specific proportional hazard models, the follow-up duration was  
15  
16 calculated in months from January 1, 2008 to the date of death or December 31, 2013 (if death  
17  
18 did not occur). For analyses using categorized exposure indices, we designated categories with  
19  
20 the lowest betas for each outcome of interest in the association analysis as the referent categories.  
21  
22 We used SAS version 9.4 (SAS Institute Inc.) for all analyses.  
23  
24  
25  
26  
27  
28

## 29 RESULTS

30  
31  
32 Of the 484,472 study participants, the mean age was 53.0 years (range: 40–80 years), and 53.3%  
33  
34 were men. A larger proportion of participants had higher income levels (household income  
35  
36 deciles 9–10, 33.3% vs. deciles 0–2, 15.9%). A majority of the study participants were non-  
37  
38 smokers (65.5%), did not drink alcohol (56.1%), and did not exercise regularly (55.8%). Most  
39  
40 participants had no history of heart disease, stroke, or cancer (table 1).  
41  
42  
43

44 Compared with the 4<sup>th</sup> decile of baseline ALT levels (17–18 U/L), the risk of all-cause mortality  
45  
46 was higher in both the higher and lower baseline ALT deciles (10<sup>th</sup> decile,  $\geq 43$  U/L: HR = 1.53,  
47  
48 95% confidence interval [CI]: 1.44, 1.62; 1<sup>st</sup> decile,  $\leq 12$  U/L: HR = 1.16, 95% CI: 1.10, 1.23).  
49  
50 Similarly, compared with the 4<sup>th</sup> decile of baseline AST levels (21 U/L), the risk of all-cause  
51  
52  
53  
54

1  
2  
3  
4 mortality was also higher in both the higher and lower baseline AST deciles (10<sup>th</sup> decile  $\geq 38$  U/L:  
5 HR = 1.70, 95% CI: 1.59, 1.81; 1<sup>st</sup> decile,  $\leq 16$  U/L: HR = 1.15, 95% CI: 1.07, 1.24). When  
6  
7  
8 compared with the 1<sup>st</sup> decile of baseline GGT levels ( $\leq 11$  U/L), the all-cause mortality risk was  
9  
10  
11 higher in higher baseline GGT deciles (10<sup>th</sup> decile,  $\geq 72$  U/L: HR = 2.05, 95% CI: 1.93, 2.18)  
12  
13 (table 2). Because the normal range of ALT is generally considered as 7–56 U/L, AST as 0–35  
14  
15 U/L, and GGT as 9–85 U/L,<sup>[2]</sup> even within the normal range, lower or higher levels of ALT and  
16  
17  
18 AST and higher levels of GGT were associated with higher mortality risk (Table 2). We  
19  
20 confirmed the non-linearity of these associations by testing the squared-terms of the log<sub>2</sub>-  
21  
22 transformed ALT, AST, and GGT levels added to the Cox models (all *p*-values for the squared-  
23  
24 terms < 0.0001).

25  
26  
27  
28 We also assessed the associations of deciles of changes in the liver enzyme levels over a 4-year  
29  
30 period with all-cause mortality. Compared with the 9<sup>th</sup> decile of ALT changes (8–13 U/L), the 6<sup>th</sup>  
31  
32 decile of AST changes (1 U/L), and the 4<sup>th</sup> decile of GGT changes (-3 to -2 U/L), respectively,  
33  
34 the risk of all-cause mortality was higher in both the higher and lower deciles of changes in the  
35  
36 corresponding liver enzyme levels (10<sup>th</sup> decile,  $\geq 14$  U/L: HR = 1.36, 95% CI: 1.24, 1.48, 1<sup>st</sup>  
37  
38 decile,  $\leq -16$  U/L: HR = 1.46, 95% CI: 1.34, 1.59 for ALT; 10<sup>th</sup> decile,  $\geq 11$  U/L: HR = 1.55, 95%  
39  
40 CI: 1.40, 1.71, 1<sup>st</sup> decile,  $\leq -12$  U/L: HR = 1.53, 95% CI: 1.38, 1.69 for AST; 10<sup>th</sup> decile,  $\geq 21$   
41  
42 U/L: HR = 1.71, 95% CI: 1.56, 1.88, 1<sup>st</sup> decile,  $\leq -19$  U/L: HR = 1.67, 95% CI: 1.52, 1.84 for  
43  
44 GGT) (table 3). We then tested the squared-terms of the log<sub>2</sub>-transformed changes in ALT, AST,  
45  
46 and GGT and confirmed the non-linearity of the associations between the changes in liver  
47  
48 enzyme levels and mortality (all *p*-values for the squared-terms < 0.0001).  
49  
50  
51  
52  
53  
54

1  
2  
3  
4 When we performed stratified analyses by the medians or quartiles of the baseline liver enzyme  
5 levels, the same non-monotonic dose-response associations between the deciles of changes in  
6 liver enzyme levels and all-cause mortality remained in each stratum (figure 2; online  
7 supplementary figure 1), similar to the results of the non-stratified analysis (table 3).  
8  
9  
10  
11  
12

13  
14 In analyses of the associations between the deciles of baseline liver enzyme levels and cause-  
15 specific mortality (mortality due to cardiovascular disease, cancer, diabetes mellitus, and liver  
16 disease), we found non-monotonic dose-response associations of baseline ALT and AST levels  
17 with mortality due to cardiovascular disease, cancer, and diabetes mellitus, whereas we found  
18 monotonic non-linear associations in other cases (online supplementary figure 2). When we  
19 analyzed the associations between the deciles of changes in the liver enzyme levels and cause-  
20 specific mortality, we found non-monotonic dose-response associations in all cases (online  
21 supplementary figure 3).  
22  
23  
24  
25  
26  
27  
28  
29  
30  
31  
32

33 In sensitivity analyses based on sex-specific deciles of the baseline and changes in liver enzyme  
34 levels, the results remained robust and did not change appreciably (data not shown). When we  
35 excluded individuals with a history of cancer ( $n = 2,732$ ), those with a history of type 2 diabetes  
36 mellitus ( $n = 20,691$ ), and those who drank  $\geq 3$ –4 times/week ( $n = 53,350$ ), the results did not  
37 change appreciably (data not shown).  
38  
39  
40  
41  
42  
43  
44  
45  
46  
47

## 48 **DISCUSSION**

49

50  
51 In the present study using the large-scale national health screening cohort, we found non-linear  
52  
53  
54

1  
2  
3  
4 (non-monotonic dose-response or monotonic non-linear) associations of baseline liver enzyme  
5 levels and changes in these levels over time with both all-cause and cause-specific mortality. The  
6 non-monotonic dose-response associations between changes in the liver enzyme levels and  
7 mortality remained after stratifying the study population into subgroups according to the baseline  
8 liver enzyme levels.  
9  
10  
11  
12  
13  
14  
15

16 Although some previous studies have reported inverse associations between ALT levels and all-  
17 cause mortality,[9,17,20] other studies have demonstrated positive associations.[21,22]  
18 Similarly, some studies have described positive associations between AST levels and all-cause  
19 mortality,[21,23,24] whereas other studies found no such associations.[25,26] This heterogeneity  
20 may be explained by the increased risk of mortality associated with both higher and lower  
21 baseline levels of ALT and AST (non-monotonic dose-response associations), as demonstrated in  
22 the present study.[3,7,8] Meanwhile, most previous studies have reported positive associations  
23 between baseline GGT levels and all-cause mortality.[15,17] The results of the present study,  
24 which suggest the presence of a monotonic non-linear association between the baseline GGT  
25 levels and all-cause mortality, may explain those earlier findings.  
26  
27  
28  
29  
30  
31  
32  
33  
34  
35  
36  
37  
38  
39

40 It has been reported that serum ALT, AST, and GGT levels are associated with a higher risk of  
41 type 2 diabetes mellitus and body mass index even within the normal ranges.[27] In the present  
42 study, liver enzyme levels within normal ranges were also found to be associated with mortality.  
43 Because the liver is a central organ of glucose and lipid metabolism and critical for maintaining  
44 health,[28] re-evaluation of the relevance of current standards is warranted.  
45  
46  
47  
48  
49  
50  
51

52 In the present study, larger changes (both increases and decreases) in the ALT, AST, and GGT  
53  
54

1  
2  
3  
4 levels over a 4-year period were associated with a higher risk of all-cause mortality when  
5  
6 compared with smaller changes. These non-linear associations remained even after the  
7  
8 participants were stratified according to the baseline liver enzyme levels. These results suggest  
9  
10 that changes in liver enzyme levels over time as well as baseline levels can be used to predict  
11  
12 mortality and assess risk by clinicians and public health practitioners. To our knowledge, this is  
13  
14 the first study to demonstrate non-monotonic dose-response associations between changes in  
15  
16 liver enzyme levels and mortality; further studies are warranted to confirm the findings.  
17  
18  
19

20  
21 In a study based on a representative U.S. population data, lower baseline ALT levels were found  
22  
23 to be associated with higher risks of cardiovascular disease, cancer, and liver disease mortality,  
24  
25 whereas higher ALT levels were only associated with a higher risk of liver disease mortality.[7]  
26  
27

28 In another study based on a representative sample of the U.S. population, higher ALT levels  
29  
30 were associated with a higher risk of liver disease mortality, whereas higher GGT levels were  
31  
32 associated with higher risks of cancer, diabetes mellitus, and liver disease mortality.[15] A study  
33  
34 using data from a prospective elderly cohort reported an association of higher AST levels with an  
35  
36 increased risk of cancer mortality, as well as an association of higher GGT levels with an  
37  
38 increased risk of cardiovascular disease mortality.[8] Among patients with acute myocardial  
39  
40 infarction who underwent percutaneous coronary intervention, ALT and AST levels were  
41  
42 associated with stenosis diameter, an indicator of stenosis severity.[29] Although the results of  
43  
44 the present study were generally consistent with those of previous studies,[7,8,15] some  
45  
46 inconsistencies were also found (e.g., positive associations of baseline ALT levels with  
47  
48 cardiovascular, cancer, and diabetes mellitus mortality in the present study but not in previous  
49  
50 studies). These discrepancies might be attributable to factors such as differences in the accuracy  
51  
52  
53  
54

1  
2  
3  
4 of cause of death data, study populations, adjusted covariates, and analytical methods. As the  
5  
6 associations of baseline and changes in liver enzyme levels with cause-specific mortality have  
7  
8 not been thoroughly investigated, additional studies are needed, particularly those using changes  
9  
10 in liver enzyme levels as explanatory variables.  
11  
12

13  
14 Serum liver enzyme levels may increase in response to various factors, including liver damage  
15  
16 and cell destruction (e.g., hepatocytes, biliary epithelium, and other cells of the organs such as  
17  
18 the heart, skeletal muscle, and kidney),[1,2] and may decrease in response to factors such as age  
19  
20 and frailty-related reductions in liver size and blood circulation.[9,10,30] Therefore, changes  
21  
22 (both increases and decreases) in liver enzyme levels over time may reflect these conditions  
23  
24 related to the deterioration of liver function and could thus be associated with a higher risk of  
25  
26 mortality.  
27  
28

29  
30 The present study has some limitations. First, although the NHIS-HEALS provides information  
31  
32 on serum ALT, AST, and GGT levels, data from other standard liver panel tests, such as  
33  
34 albumin, alkaline phosphatase, and conjugated and unconjugated bilirubin levels, are not  
35  
36 available. This limits our ability to assess liver function comprehensively. Second, although the  
37  
38 national health screening program was performed at designated health care institutions meeting  
39  
40 the quality standards, liver enzyme levels were analysed by different laboratories with a different  
41  
42 sensitivity and specificity, leading to potential information bias. Third, the present study used  
43  
44 data that were not primarily collected for the purpose of research. Therefore, information on the  
45  
46 sociodemographic factors, lifestyles, past medical histories, and family histories are insufficient,  
47  
48 leading to the possibility of residual confounding. Fourth, although common liver disease, such  
49  
50  
51  
52  
53  
54

1  
2  
3  
4 as nonalcoholic fatty liver disease, could increase liver enzyme levels [31] and increase mortality  
5  
6 [32–34] as well, specific mechanisms underlying the association between liver enzyme levels  
7  
8 and mortality could not be identified thoroughly.  
9

10  
11 However, the present study also has notable strengths. First, to our knowledge, this is the first  
12  
13 study to report non-monotonic dose-response associations between changes in liver enzyme  
14  
15 levels over time and mortality. Second, we used a large-scale cohort constructed from national  
16  
17 administration data, which has a negligible follow-up loss. The large sample size ( $n = 484,472$ )  
18  
19 of the present study allowed us to evaluate the potential associations with sufficient power.  
20  
21 Third, we identified the dates and causes of death using a national database maintained by  
22  
23 Statistics Korea, which covers all individuals residing in the Republic of Korea. The accuracy of  
24  
25 the recorded causes of death in this database is considered high (>90%).[35]  
26  
27  
28  
29  
30  
31  
32  
33

## 34 CONCLUSIONS

35  
36 We found non-linear associations of the baseline liver enzyme levels and their changes over time  
37  
38 with risks of mortality. The results of the present study suggest that changes in liver enzyme  
39  
40 levels, as well as the baseline levels, can be used to predict health outcomes such as mortality  
41  
42 and to assess risk in clinical and public health settings.  
43  
44  
45  
46  
47  
48  
49

## 50 Acknowledgements

51  
52 We would like to thank the National Health Insurance Service for their cooperation. We also  
53  
54

1  
2  
3  
4 would like to thank all those who planned, administered, conducted, and participated in the  
5  
6 National Health Screening Program.  
7

### 8 9 **Author Contributions**

10  
11 KK, JJ, HKS, CHK, HK, and YJK contributed to conception and design of the study. KNK  
12  
13 conducted statistical analyses and wrote the initial manuscript. JJ, HKS, CHK, HK, and YJK  
14  
15 reviewed and revised the manuscript. All authors read and approved the final manuscript.  
16  
17  
18

### 19 **Funding**

20  
21  
22 This work was supported by Seoul National University Hospital and the National Health  
23  
24 Insurance Service of the Republic of Korea.  
25  
26  
27

### 28 **Disclaimer**

29  
30  
31 The views in this study are those of the authors and not necessarily those of the Seoul National  
32  
33 University Hospital or the National Health Insurance Service of the Republic of Korea.  
34  
35

### 36 **Competing interests**

37  
38  
39 The authors declare that they have no competing interests.  
40  
41

### 42 **Patient consent**

43  
44  
45 Not required.  
46  
47

### 48 **Ethics approval**

49  
50  
51 The study protocol was reviewed and approved by the Institutional Review Board of Seoul  
52  
53



1  
2  
3  
4 National University Hospital (IRB no. E-1804-045-936).  
5  
6

7 **Provenance and peer review**  
8  
9

10 Not commissioned; externally peer reviewed.  
11  
12

13 **Data sharing statement**  
14  
15

16 The National Health Insurance Service-National Health Screening Cohort (NHIS-HEALS),  
17 which is used in the present study, is a de-identified cohort released to researchers by the NHIS  
18 for the purpose of public research. The data sets are provided to researchers after the study  
19 protocols are approved by the IRB of the researcher's institute and by the NHIS. Researchers can  
20 request the data sets through the website <https://nhiss.nhis.or.kr/bd/ay/bdaya001iv.do>.  
21  
22  
23  
24  
25  
26  
27  
28  
29  
30  
31  
32  
33  
34  
35  
36  
37  
38  
39  
40  
41  
42  
43  
44  
45  
46  
47  
48  
49  
50  
51  
52  
53  
54  
55  
56  
57  
58  
59  
60

## REFERENCES

- 1 Green RM, Flamm S. AGA technical review on the evaluation of liver chemistry tests. *Gastroenterology* 2002;**123**:1367–84.
- 2 Gowda S, Desai PB, Hull VV, *et al.* A review on laboratory liver function tests. *Pan Afr Med J* 2009;**3**:17.
- 3 Kunutsor SK, Apekey TA, Seddoh D, *et al.* Liver enzymes and risk of all-cause mortality in general populations: a systematic review and meta-analysis. *Int J Epidemiol* 2014;**43**:187–201. doi:10.1093/ije/dyt192
- 4 Kunutsor SK, Apekey TA, Khan H. Liver enzymes and risk of cardiovascular disease in the general population: a meta-analysis of prospective cohort studies. *Atherosclerosis* 2014;**236**:7–17. doi:10.1016/j.atherosclerosis.2014.06.006
- 5 Schneider ALC, Lazo M, Ndumele CE, *et al.* Liver enzymes, race, gender and diabetes risk: the Atherosclerosis Risk in Communities (ARIC) Study. *Diabet Med J Br Diabet Assoc* 2013;**30**:926–33. doi:10.1111/dme.12187
- 6 Kunutsor SK, Apekey TA, Van Hemelrijck M, *et al.* Gamma glutamyltransferase, alanine aminotransferase and risk of cancer: systematic review and meta-analysis. *Int J Cancer* 2015;**136**:1162–70. doi:10.1002/ijc.29084
- 7 Ruhl CE, Everhart JE. The association of low serum alanine aminotransferase activity with mortality in the US population. *Am J Epidemiol* 2013;**178**:1702–11. doi:10.1093/aje/kwt209
- 8 Koehler EM, Sanna D, Hansen BE, *et al.* Serum liver enzymes are associated with all-cause mortality in an elderly population. *Liver Int Off J Int Assoc Study Liver* 2014;**34**:296–304. doi:10.1111/liv.12311
- 9 Deetman PE, Alkhalaf A, Landman GWD, *et al.* Alanine aminotransferase and mortality in patients with type 2 diabetes (ZODIAC-38). *Eur J Clin Invest* 2015;**45**:807–14. doi:10.1111/eci.12474
- 10 Dong MH, Bettencourt R, Brenner DA, *et al.* Serum levels of alanine aminotransferase decrease with age in longitudinal analysis. *Clin Gastroenterol Hepatol Off Clin Pract J Am Gastroenterol Assoc* 2012;**10**:285-290.e1. doi:10.1016/j.cgh.2011.10.014
- 11 Seong SC, Kim Y-Y, Park SK, *et al.* Cohort profile: the National Health Insurance Service-National Health Screening Cohort (NHIS-HEALS) in Korea. *BMJ Open* 2017;**7**:e016640. doi:10.1136/bmjopen-2017-016640
- 12 Lee G, Choi S, Kim K, *et al.* Association of Hemoglobin Concentration and Its Change With

- Cardiovascular and All-Cause Mortality. *J Am Heart Assoc* 2018;7. doi:10.1161/JAHA.117.007723
- 13 Shin WY, Lee T, Jeon DH, *et al.* Diabetes, Frequency of Exercise, and Mortality Over 12 Years: Analysis of the National Health Insurance Service-Health Screening (NHIS-HEALS) Database. *J Korean Med Sci* 2018;**33**:e60. doi:10.3346/jkms.2018.33.e60
- 14 Shin WY, Kim HC, Lee T, *et al.* Combined effects of diabetes and low household income on mortality: a 12-year follow-up study of 505 677 Korean adults. *Diabet Med J Br Diabet Assoc* Published Online First: 31 May 2018. doi:10.1111/dme.13695
- 15 Ruhl CE, Everhart JE. Elevated serum alanine aminotransferase and gamma-glutamyltransferase and mortality in the United States population. *Gastroenterology* 2009;**136**:477-485.e11. doi:10.1053/j.gastro.2008.10.052
- 16 Liu Z, Ning H, Que S, *et al.* Complex association between alanine aminotransferase activity and mortality in general population: a systematic review and meta-analysis of prospective studies. *PLoS One* 2014;**9**:e91410. doi:10.1371/journal.pone.0091410
- 17 Williams KH, Sullivan DR, Nicholson GC, *et al.* Opposite associations between alanine aminotransferase and  $\gamma$ -glutamyl transferase levels and all-cause mortality in type 2 diabetes: Analysis of the Fenofibrate Intervention and Event Lowering in Diabetes (FIELD) study. *Metabolism* 2016;**65**:783–93. doi:10.1016/j.metabol.2015.12.008
- 18 Dignam JJ, Zhang Q, Kocherginsky M. The use and interpretation of competing risks regression models. *Clin Cancer Res Off J Am Assoc Cancer Res* 2012;**18**:2301–8. doi:10.1158/1078-0432.CCR-11-2097
- 19 Noordzij M, Leffondré K, van Stralen KJ, *et al.* When do we need competing risks methods for survival analysis in nephrology? *Nephrol Dial Transplant Off Publ Eur Dial Transpl Assoc - Eur Ren Assoc* 2013;**28**:2670–7. doi:10.1093/ndt/gft355
- 20 Ford I, Mooijaart SP, Lloyd S, *et al.* The inverse relationship between alanine aminotransferase in the normal range and adverse cardiovascular and non-cardiovascular outcomes. *Int J Epidemiol* 2011;**40**:1530–8. doi:10.1093/ije/dyr172
- 21 Kim HC, Nam CM, Jee SH, *et al.* Normal serum aminotransferase concentration and risk of mortality from liver diseases: prospective cohort study. *BMJ* 2004;**328**:983. doi:10.1136/bmj.38050.593634.63
- 22 Nakamura K, Okamura T, Kanda H, *et al.* The value of combining serum alanine aminotransferase levels and body mass index to predict mortality and medical costs: a 10-year follow-up study of National Health Insurance in Shiga, Japan. *J Epidemiol* 2006;**16**:15–20.
- 23 Ravel V, Streja E, Molnar MZ, *et al.* Association of aspartate aminotransferase with mortality

- in hemodialysis patients. *Nephrol Dial Transplant Off Publ Eur Dial Transpl Assoc - Eur Ren Assoc* 2016;**31**:814–22. doi:10.1093/ndt/gfv310
- 24 Pinkham CA, Krause KJ. Liver function tests and mortality in a cohort of life insurance applicants. *J Insur Med N Y N* 2009;**41**:170–7.
- 25 Goessling W, Massaro JM, Vasan RS, *et al*. Aminotransferase levels and 20-year risk of metabolic syndrome, diabetes, and cardiovascular disease. *Gastroenterology* 2008;**135**:1935–44, 1944.e1. doi:10.1053/j.gastro.2008.09.018
- 26 Fulks M, Stout RL, Dolan VF. Using liver enzymes as screening tests to predict mortality risk. *J Insur Med N Y N* 2008;**40**:191–203.
- 27 Kälsch J, Bechmann LP, Heider D, *et al*. Normal liver enzymes are correlated with severity of metabolic syndrome in a large population based cohort. *Sci Rep* 2015;**5**:13058. doi:10.1038/srep13058
- 28 Bechmann LP, Hannivoort RA, Gerken G, *et al*. The interaction of hepatic lipid and glucose metabolism in liver diseases. *J Hepatol* 2012;**56**:952–64. doi:10.1016/j.jhep.2011.08.025
- 29 Baars T, Neumann U, Jinawy M, *et al*. In Acute Myocardial Infarction Liver Parameters Are Associated With Stenosis Diameter. *Medicine (Baltimore)* 2016;**95**:e2807. doi:10.1097/MD.0000000000002807
- 30 Tan JL, Eastment JG, Poudel A, *et al*. Age-Related Changes in Hepatic Function: An Update on Implications for Drug Therapy. *Drugs Aging* 2015;**32**:999–1008. doi:10.1007/s40266-015-0318-1
- 31 Loria P, Adinolfi LE, Bellentani S, *et al*. Practice guidelines for the diagnosis and management of nonalcoholic fatty liver disease. A decalogue from the Italian Association for the Study of the Liver (AISF) Expert Committee. *Dig Liver Dis Off J Ital Soc Gastroenterol Ital Assoc Study Liver* 2010;**42**:272–82. doi:10.1016/j.dld.2010.01.021
- 32 Italian Association for the Study of the Liver (AISF). AISF position paper on nonalcoholic fatty liver disease (NAFLD): Updates and future directions. *Dig Liver Dis Off J Ital Soc Gastroenterol Ital Assoc Study Liver* 2017;**49**:471–83. doi:10.1016/j.dld.2017.01.147
- 33 Targher G, Byrne CD, Lonardo A, *et al*. Non-alcoholic fatty liver disease and risk of incident cardiovascular disease: A meta-analysis. *J Hepatol* 2016;**65**:589–600. doi:10.1016/j.jhep.2016.05.013
- 34 Lonardo A, Romagnoli D. Gamma glutamyl transferase: A novel cardiovascular outfit for an old liver test. *Indian J Med Res* 2016;**143**:4–7. doi:10.4103/0971-5916.178574
- 35 Won TY, Kang BS, Im TH, *et al*. The Study of Accuracy of Death Statistics. *J Korean Soc*

1  
2  
3  
4 *Emerg Med* 2007;**18**:256–62.  
5  
6  
7  
8  
9  
10  
11  
12  
13  
14  
15  
16  
17  
18  
19  
20  
21  
22  
23  
24  
25  
26  
27  
28  
29  
30  
31  
32  
33  
34  
35  
36  
37  
38  
39  
40  
41  
42  
43  
44  
45  
46  
47  
48  
49  
50  
51  
52  
53  
54  
55  
56  
57  
58  
59  
60

For peer review only

**Table 1.** Baseline sociodemographic characteristics and liver enzyme levels of the study participants (2002–2003) ( $n = 484,472$ )

| Characteristics            | Total          | ALT (U/L)      | AST (U/L)      | GGT (U/L)      |
|----------------------------|----------------|----------------|----------------|----------------|
|                            | <i>n</i> (%)   | GM $\pm$ GSD   |                |                |
| Age (years)                |                |                |                |                |
| 40–49                      | 212,004 (43.8) | 21.8 $\pm$ 1.7 | 23.5 $\pm$ 1.4 | 26.1 $\pm$ 2.2 |
| 50–59                      | 140,742 (29.1) | 22.8 $\pm$ 1.6 | 24.9 $\pm$ 1.4 | 26.8 $\pm$ 2.1 |
| 60–69                      | 98,759 (20.4)  | 21.6 $\pm$ 1.6 | 25.4 $\pm$ 1.4 | 24.6 $\pm$ 2.0 |
| 70–80                      | 32,967 (6.8)   | 19.5 $\pm$ 1.6 | 25.2 $\pm$ 1.4 | 21.6 $\pm$ 1.9 |
| Sex                        |                |                |                |                |
| Men                        | 258,010 (53.3) | 25.3 $\pm$ 1.7 | 26.1 $\pm$ 1.5 | 35.8 $\pm$ 2.1 |
| Women                      | 226,462 (46.7) | 18.5 $\pm$ 1.6 | 22.6 $\pm$ 1.4 | 17.6 $\pm$ 1.8 |
| Household income (deciles) |                |                |                |                |
| 0–2                        | 76,994 (15.9)  | 20.8 $\pm$ 1.7 | 24.2 $\pm$ 1.4 | 23.7 $\pm$ 2.1 |
| 3–5                        | 106,260 (21.9) | 21.6 $\pm$ 1.7 | 24.7 $\pm$ 1.5 | 25.1 $\pm$ 2.1 |
| 6–8                        | 139,763 (28.9) | 22.4 $\pm$ 1.7 | 24.7 $\pm$ 1.4 | 26.6 $\pm$ 2.1 |
| 9–10                       | 161,455 (33.3) | 22.2 $\pm$ 1.7 | 24.0 $\pm$ 1.4 | 26.2 $\pm$ 2.1 |
| Smoking status             |                |                |                |                |
| Non-smoker                 | 317,199 (65.5) | 20.5 $\pm$ 1.6 | 23.6 $\pm$ 1.4 | 21.4 $\pm$ 1.9 |
| Ex-smoker                  | 40,797 (8.4)   | 25.4 $\pm$ 1.7 | 25.8 $\pm$ 1.4 | 34.1 $\pm$ 2.0 |

|                         |                |            |            |            |
|-------------------------|----------------|------------|------------|------------|
| Smoker                  | 109,868 (22.7) | 25.0 ± 1.7 | 26.0 ± 1.5 | 39.0 ± 2.1 |
| Missing                 | 16,608 (3.4)   | 22.0 ± 1.7 | 24.6 ± 1.4 | 25.4 ± 2.1 |
| Alcohol consumption     |                |            |            |            |
| None                    | 271,551 (56.1) | 20.4 ± 1.6 | 23.2 ± 1.4 | 20.1 ± 1.8 |
| ≤1–2 times/week         | 151,559 (31.3) | 23.4 ± 1.7 | 24.9 ± 1.4 | 31.4 ± 2.1 |
| ≥3–4 times/week         | 53,350 (11.0)  | 25.9 ± 1.7 | 28.9 ± 1.5 | 51.1 ± 2.3 |
| Missing                 | 8,012 (1.7)    | 20.9 ± 1.6 | 23.5 ± 1.4 | 21.0 ± 1.9 |
| Physical activity       |                |            |            |            |
| Did not exercise        | 270,329 (55.8) | 21.4 ± 1.7 | 24.3 ± 1.4 | 24.5 ± 2.1 |
| ≤1–2 times/week         | 112,413 (23.2) | 23.0 ± 1.7 | 24.5 ± 1.4 | 28.5 ± 2.1 |
| ≥3–4 times/week         | 89,843 (18.5)  | 21.9 ± 1.6 | 24.4 ± 1.4 | 25.9 ± 2.1 |
| Missing                 | 11,887 (2.5)   | 21.7 ± 1.7 | 25.4 ± 1.4 | 25.2 ± 2.1 |
| Body mass index         |                |            |            |            |
| (kg/m <sup>2</sup> )    |                |            |            |            |
| <18.5                   | 10,599 (2.2)   | 17.7 ± 1.6 | 24.6 ± 1.5 | 21.1 ± 2.2 |
| 18.5–22.9               | 171,108 (35.3) | 19.1 ± 1.6 | 23.4 ± 1.4 | 21.9 ± 2.1 |
| 23–24.9                 | 132,394 (27.3) | 21.9 ± 1.6 | 24.0 ± 1.4 | 25.9 ± 2.1 |
| 25–29.9                 | 156,051 (32.2) | 25.1 ± 1.7 | 25.5 ± 1.4 | 30.1 ± 2.1 |
| ≥30                     | 13,926 (2.9)   | 29.0 ± 1.8 | 27.6 ± 1.5 | 32.1 ± 2.1 |
| Missing                 | 394 (0.1)      | 21.4 ± 1.6 | 24.6 ± 1.4 | 22.2 ± 2.0 |
| Systolic blood pressure |                |            |            |            |

(mmHg)

|           |                |            |            |            |
|-----------|----------------|------------|------------|------------|
| <120      | 140,993 (29.1) | 19.7 ± 1.6 | 22.8 ± 1.4 | 21.1 ± 2.0 |
| 120–139.9 | 214,824 (44.3) | 22.3 ± 1.7 | 24.5 ± 1.4 | 26.4 ± 2.1 |
| ≥140      | 128,464 (26.5) | 23.7 ± 1.7 | 26.0 ± 1.5 | 30.4 ± 2.2 |
| Missing   | 191 (0.04)     | 21.1 ± 1.7 | 23.3 ± 1.5 | 24.4 ± 2.0 |

Diastolic blood  
pressure (mmHg)

|         |                |            |            |            |
|---------|----------------|------------|------------|------------|
| <80     | 191,221 (39.5) | 20.1 ± 1.6 | 23.2 ± 1.4 | 21.7 ± 2.0 |
| 80–89.9 | 167,612 (34.6) | 22.4 ± 1.7 | 24.6 ± 1.4 | 26.6 ± 2.1 |
| ≥90     | 125,372 (25.9) | 24.2 ± 1.7 | 26.0 ± 1.5 | 31.5 ± 2.2 |
| Missing | 267 (0.1)      | 21.5 ± 1.7 | 23.4 ± 1.4 | 23.8 ± 2.0 |

Fasting glucose level  
(mg/dL)

|           |                |            |            |            |
|-----------|----------------|------------|------------|------------|
| <70       | 8,510 (1.8)    | 20.3 ± 1.7 | 23.9 ± 1.4 | 23.2 ± 2.0 |
| 70–99.9   | 324,064 (66.9) | 20.9 ± 1.6 | 23.9 ± 1.4 | 23.7 ± 2.0 |
| 100–125.9 | 114,597 (23.7) | 23.6 ± 1.7 | 25.3 ± 1.5 | 29.1 ± 2.2 |
| ≥126      | 37,167 (7.7)   | 26.5 ± 1.7 | 26.1 ± 1.6 | 35.9 ± 2.3 |
| Missing   | 134 (0.03)     | 19.7 ± 1.7 | 22.8 ± 1.7 | 20.7 ± 2.0 |

Past history of heart  
disease

|    |                |            |            |            |
|----|----------------|------------|------------|------------|
| No | 494,401 (98.6) | 21.9 ± 1.7 | 24.4 ± 1.4 | 25.6 ± 2.1 |
|----|----------------|------------|------------|------------|



|    |                        |                |            |            |            |
|----|------------------------|----------------|------------|------------|------------|
| 4  | Yes                    | 7,187 (1.4)    | 22.4 ± 1.6 | 25.0 ± 1.4 | 26.3 ± 2.0 |
| 6  | Past history of stroke |                |            |            |            |
| 9  | No                     | 499,352 (99.6) | 21.9 ± 1.7 | 24.4 ± 1.4 | 25.7 ± 2.1 |
| 11 | Yes                    | 2,236 (0.5)    | 22.0 ± 1.6 | 24.6 ± 1.4 | 27.4 ± 2.0 |
| 13 | Past history of cancer |                |            |            |            |
| 16 | No                     | 498,856 (99.5) | 21.9 ± 1.7 | 24.4 ± 1.4 | 25.7 ± 2.1 |
| 18 | Yes                    | 2,732 (0.5)    | 20.7 ± 1.6 | 25.0 ± 1.4 | 21.2 ± 1.9 |

Abbreviations: ALT, alanine aminotransferase; AST, aspartate aminotransferase; GGT, gamma glutamyltransferase; GM, geometric mean; GSD, geometric standard deviation

**Table 2.** Associations<sup>a</sup> between baseline liver enzyme levels (2002–2003) and all-cause mortality (2008–2013)

| Decile <sup>b</sup> | Levels (U/L) | <i>n</i> (%)  | HR   | 95% CI     | <i>p</i> -value |
|---------------------|--------------|---------------|------|------------|-----------------|
| ALT                 |              |               |      |            |                 |
| 1                   | ≤12          | 56,870 (11.7) | 1.16 | 1.10, 1.23 | <0.0001         |
| 2                   | 13–14        | 41,904 (8.7)  | 1.11 | 1.04, 1.17 | 0.0014          |
| 3                   | 15–16        | 46,115 (9.5)  | 1.07 | 1.01, 1.13 | 0.0292          |
| 4                   | 17–18        | 46,272 (9.6)  | Ref. | Ref.       | Ref.            |
| 5                   | 19–21        | 62,738 (13.0) | 1.06 | 1.01, 1.12 | 0.0320          |
| 6                   | 22–23        | 33,898 (7.0)  | 1.04 | 0.97, 1.11 | 0.2722          |
| 7                   | 24–27        | 54,157 (11.2) | 1.05 | 0.99, 1.11 | 0.1046          |
| 8                   | 28–32        | 46,873 (9.7)  | 1.11 | 1.05, 1.18 | 0.0005          |
| 9                   | 33–42        | 49,009 (10.1) | 1.17 | 1.10, 1.24 | <0.0001         |
| 10                  | ≥43          | 46,601 (9.6)  | 1.53 | 1.44, 1.62 | <0.0001         |
| AST                 |              |               |      |            |                 |
| 1                   | ≤16          | 48,178 (10.0) | 1.15 | 1.07, 1.24 | 0.0001          |
| 2                   | 17–18        | 45,357 (9.4)  | 1.09 | 1.01, 1.18 | 0.0217          |
| 3                   | 19–20        | 58,461 (12.1) | 1.09 | 1.02, 1.17 | 0.0175          |
| 4                   | 21           | 30,304 (6.3)  | Ref. | Ref.       | Ref.            |
| 5                   | 22–23        | 58,761 (12.1) | 1.03 | 0.96, 1.10 | 0.4151          |
| 6                   | 24–25        | 52,190 (10.8) | 1.06 | 0.99, 1.14 | 0.0896          |

|    |       |               |      |            |         |
|----|-------|---------------|------|------------|---------|
| 7  | 26–27 | 41,805 (8.6)  | 1.09 | 1.01, 1.17 | 0.0185  |
| 8  | 28–31 | 58,055 (12.0) | 1.08 | 1.01, 1.15 | 0.0257  |
| 9  | 32–37 | 44,515 (9.2)  | 1.20 | 1.12, 1.28 | <0.0001 |
| 10 | ≥38   | 46,802 (9.7)  | 1.70 | 1.59, 1.81 | <0.0001 |

## GGT

|    |       |               |      |            |         |
|----|-------|---------------|------|------------|---------|
| 1  | ≤11   | 54,316 (11.2) | Ref. | Ref.       | Ref.    |
| 2  | 12–13 | 36,355 (7.5)  | 1.01 | 0.94, 1.08 | 0.7713  |
| 3  | 14–16 | 55,121 (11.4) | 1.07 | 1.00, 1.13 | 0.0412  |
| 4  | 17–19 | 49,756 (10.3) | 1.10 | 1.04, 1.17 | 0.0019  |
| 5  | 20–23 | 53,476 (11.0) | 1.12 | 1.06, 1.19 | 0.0002  |
| 6  | 24–27 | 41,003 (8.5)  | 1.16 | 1.09, 1.24 | <0.0001 |
| 7  | 28–34 | 50,696 (10.5) | 1.24 | 1.17, 1.32 | <0.0001 |
| 8  | 35–45 | 48,116 (9.9)  | 1.31 | 1.23, 1.39 | <0.0001 |
| 9  | 46–71 | 49,144 (10.1) | 1.46 | 1.37, 1.55 | <0.0001 |
| 10 | ≥72   | 46,450 (9.6)  | 2.05 | 1.93, 2.18 | <0.0001 |

Abbreviations: HR, hazard ratio; CI, confidence interval; ALT, alanine aminotransferase; AST, aspartate aminotransferase; GGT, gamma glutamyltransferase

<sup>a</sup>Adjusted for age, sex, household income decile, smoking status, alcohol consumption, physical activity, body mass index, systolic and diastolic blood pressure, fasting glucose levels, and past history of heart disease, stroke, and cancer.

<sup>b</sup>Deciles for baseline levels of alanine aminotransferase, aspartate aminotransferase, and gamma

1  
2  
3  
4  
5  
6  
7  
8  
9  
10  
11  
12  
13  
14  
15  
16  
17  
18  
19  
20  
21  
22  
23  
24  
25  
26  
27  
28  
29  
30  
31  
32  
33  
34  
35  
36  
37  
38  
39  
40  
41  
42  
43  
44  
45  
46  
47  
48  
49  
50  
51  
52  
53  
54  
55  
56  
57  
58  
59  
60

glutamyltransferase

For peer review only

**Table 3.** Associations<sup>a</sup> between changes in liver enzyme levels since the baseline survey (2002–2003) and all-cause mortality (2008–2013)

| Decile <sup>b</sup> | Levels (U/L) | <i>n</i> (%)  | HR   | 95% CI     | <i>p</i> -value |
|---------------------|--------------|---------------|------|------------|-----------------|
| ALT                 |              |               |      |            |                 |
| 1                   | ≤-16         | 28,441 (9.6)  | 1.46 | 1.34, 1.59 | <0.0001         |
| 2                   | -15 to -9    | 29,670 (10.0) | 1.23 | 1.13, 1.34 | <0.0001         |
| 3                   | -8 to -5     | 34,065 (11.4) | 1.11 | 1.02, 1.21 | 0.0137          |
| 4                   | -4 to -3     | 23,295 (7.8)  | 1.08 | 0.98, 1.18 | 0.1334          |
| 5                   | -2 to -1     | 27,637 (9.3)  | 1.12 | 1.03, 1.23 | 0.0127          |
| 6                   | 0–1          | 28,738 (9.7)  | 1.11 | 1.02, 1.22 | 0.0226          |
| 7                   | 2–4          | 38,771 (13.0) | 1.02 | 0.94, 1.12 | 0.5916          |
| 8                   | 5–7          | 27,754 (9.3)  | 1.01 | 0.92, 1.11 | 0.8602          |
| 9                   | 8–13         | 29,713 (10.0) | Ref. | Ref.       | Ref.            |
| 10                  | ≥14          | 29,842 (10.0) | 1.36 | 1.24, 1.48 | <0.0001         |
| AST                 |              |               |      |            |                 |
| 1                   | ≤-12         | 27,631 (9.3)  | 1.53 | 1.38, 1.69 | <0.0001         |
| 2                   | -11 to -7    | 29,839 (10.0) | 1.23 | 1.11, 1.36 | 0.0001          |
| 3                   | -6 to -4     | 33,587 (11.3) | 1.09 | 0.98, 1.21 | 0.1081          |
| 4                   | -3 to -2     | 30,433 (10.2) | 1.15 | 1.03, 1.28 | 0.0113          |
| 5                   | -1 to 0      | 35,094 (11.8) | 1.10 | 0.99, 1.22 | 0.0773          |
| 6                   | 1            | 17,637 (5.9)  | Ref. | Ref.       | Ref.            |

|     |           |               |      |            |         |
|-----|-----------|---------------|------|------------|---------|
| 7   | 2–3       | 32,282 (10.8) | 1.02 | 0.92, 1.14 | 0.7010  |
| 8   | 4–6       | 36,128 (12.1) | 1.05 | 0.95, 1.17 | 0.3479  |
| 9   | 7–10      | 26,425 (8.9)  | 1.04 | 0.93, 1.16 | 0.4996  |
| 10  | ≥11       | 28,874 (9.7)  | 1.55 | 1.40, 1.71 | <0.0001 |
| GGT |           |               |      |            |         |
| 1   | ≤-19      | 28,402 (9.5)  | 1.67 | 1.52, 1.84 | <0.0001 |
| 2   | -18 to -9 | 28,240 (9.5)  | 1.15 | 1.05, 1.27 | 0.0043  |
| 3   | -8 to -4  | 35,442 (11.9) | 1.09 | 0.99, 1.20 | 0.0931  |
| 4   | -3 to -2  | 22,232 (7.5)  | Ref. | Ref.       | Ref.    |
| 5   | -1 to 1   | 41,200 (13.8) | 1.01 | 0.92, 1.12 | 0.7703  |
| 6   | 2–3       | 26,555 (8.9)  | 1.00 | 0.90, 1.12 | 0.9599  |
| 7   | 4–6       | 31,623 (10.6) | 1.10 | 1.00, 1.21 | 0.0602  |
| 8   | 7–10      | 26,769 (9.0)  | 1.07 | 0.96, 1.18 | 0.2187  |
| 9   | 11–20     | 28,416 (9.5)  | 1.22 | 1.11, 1.35 | <0.0001 |
| 10  | ≥21       | 29,297 (9.8)  | 1.71 | 1.56, 1.88 | <0.0001 |

Abbreviations: HR, hazard ratio; CI, confidence interval; ALT, alanine aminotransferase; AST, aspartate aminotransferase; GGT, gamma glutamyltransferase

<sup>a</sup>Adjusted for age, sex, household income decile, smoking status, alcohol consumption, physical activity, body mass index, systolic and diastolic blood pressure, fasting glucose levels, and past history of heart disease, stroke, and cancer.

<sup>b</sup>Deciles for changes in levels of alanine aminotransferase, aspartate aminotransferase, and

1  
2  
3  
4 gamma glutamyltransferase during the 4 years since the baseline survey  
5  
6  
7  
8  
9  
10  
11  
12  
13  
14  
15  
16  
17  
18  
19  
20  
21  
22  
23  
24  
25  
26  
27  
28  
29  
30  
31  
32  
33  
34  
35  
36  
37  
38  
39  
40  
41  
42  
43  
44  
45  
46  
47  
48  
49  
50  
51  
52  
53  
54  
55  
56  
57  
58  
59  
60

For peer review only

## Figure Legends

**Figure 1.** Schematic representation of the study design and period.

**Figure 2.** Associations<sup>a</sup> between the deciles of changes in liver enzyme levels over a 4-year period and all-cause mortality, stratified by the median value of each baseline liver enzyme level.

Abbreviations: ALT, alanine aminotransferase; AST, aspartate aminotransferase; GGT, gamma glutamyltransferase

<sup>a</sup>Hazard ratios were estimated using Cox proportional hazard models adjusted for age, sex, household income decile, smoking status, alcohol consumption, physical activity, body mass index, systolic and diastolic blood pressure, fasting glucose levels, and past history of heart disease, stroke, and cancer.



1  
2  
3  
4  
5  
6  
7  
8  
9  
10  
11  
12  
13  
14  
15  
16  
17  
18  
19  
20  
21  
22  
23  
24  
25  
26  
27  
28  
29  
30  
31  
32  
33  
34  
35  
36  
37  
38  
39  
40  
41  
42  
43  
44  
45  
46  
47  
48  
49  
50  
51  
52  
53  
54  
55  
56  
57  
58  
59  
60

| Year                                    | 2002                                                                              | 2003 | 2004                                                                              | 2005 | 2006 | 2007 | 2008 | 2009 | 2010 | 2011 | 2012 | 2013 |
|-----------------------------------------|-----------------------------------------------------------------------------------|------|-----------------------------------------------------------------------------------|------|------|------|------|------|------|------|------|------|
| Exposure 1:<br>Baseline Liver<br>Enzyme |                                                                                   |      |                                                                                   |      |      |      |      |      |      |      |      |      |
| Exposure 2:<br>Liver Enzyme<br>Change   |  |      |  |      |      |      |      |      |      |      |      |      |
| Outcome:<br>Mortality                   |                                                                                   |      |                                                                                   |      |      |      |      |      |      |      |      |      |

Figure 1

338x190mm (300 x 300 DPI)

1  
2  
3  
4  
5  
6  
7  
8  
9  
10  
11  
12  
13  
14  
15  
16  
17  
18  
19  
20  
21  
22  
23  
24  
25  
26  
27  
28  
29  
30  
31  
32  
33  
34  
35  
36  
37  
38  
39  
40  
41  
42  
43  
44  
45  
46  
47  
48  
49  
50  
51  
52  
53  
54  
55  
56  
57  
58  
59  
60



Figure 2

338x190mm (300 x 300 DPI)

1  
2  
3  
4 **Associations of serum liver enzyme levels and their changes over time with all-cause and**  
5 **cause-specific mortality in the general population: a large-scale national health screening**  
6 **cohort study**  
7  
8  
9

10  
11  
12  
13  
14  
15 Kyoung-Nam Kim, Jungmin Joo, Ho Kyung Sung, Chee Hae Kim, Haebin Kim, and Yong-Jin  
16  
17 Kwon  
18  
19  
20  
21  
22

23 **Table of Contents:**  
24

25  
26 **Supplementary Methods**  
27

28  
29 **Supplementary Figure 1.** Associations between deciles of changes in liver enzyme levels over a  
30  
31 4-year period and all-cause mortality, stratified by the quartiles of each baseline liver enzyme  
32  
33 levels.  
34  
35

36  
37 **Supplementary Figure 2.** Associations between deciles of the baseline liver enzyme levels and  
38  
39 cause-specific mortality.  
40

41  
42 **Supplementary Figure 3.** Associations between deciles of changes in liver enzyme levels over a  
43  
44 4-year period and cause-specific mortality.  
45  
46  
47  
48  
49  
50  
51  
52  
53  
54

## Supplementary Methods

In a sensitivity analysis, because distributions of liver enzyme levels were different by sex (U/L, ALT: median, 25, interquartile range [IQR], 16 among men; median, 18, IQR, 10 among women; AST: median, 25, IQR, 11 among men; median, 22, IQR, 9 among women; GGT: median, 33, IQR, 34 among men; median, 16, IQR, 12 among women), we repeated all analyses using sex-specific cut-off points for deciles of the baseline liver enzyme levels (U/L, ALT:  $\leq 14$ , 15–16, 17–19, 20–21, 22–24, 25–27, 28–31, 32–37, 38–48, or  $\geq 49$  among men;  $\leq 10$ , 11–12, 13–14, 15–16, 17, 18–19, 20–22, 23–26, 27–33, or  $\geq 34$  among women; AST:  $\leq 17$ , 18–19, 20–21, 22–23, 24–25, 26–27, 28–29, 30–33, 34–40, or  $\geq 41$  among men;  $\leq 15$ , 16–17, 18–19, 20, 21–22, 23, 24–25, 26–28, 29–33, or  $\geq 34$  among women; GGT:  $\leq 15$ , 16–19, 20–23, 24–27, 28–32, 33–39, 40–48, 49–63, 64–95, or  $\geq 96$  among men;  $\leq 9$ , 10–11, 12, 13–14, 15–16, 17–18, 19–21, 22–26, 27–35, or  $\geq 36$  among women) and changes in liver enzyme levels (U/L, ALT:  $\leq -19$ , -18 to -11, -10 to -7, -6 to -4, -3 to -1, 0–1, 2–4, 5–7, 8–14, or  $\geq 15$  among men;  $\leq -12$ , -11 to -7, -6 to -4, -3 to -2, -1 to 0, 1–2, 3–4, 5–7, 8–12, or  $\geq 13$  among women; AST:  $\leq -13$ , -12 to -8, -7 to -5, -4 to -3, -2 to -1, 0–1, 2–3, 4–6, 7–10, or  $\geq 11$  among men;  $\leq -10$ , -9 to -6, -5 to -3, -2, -1 to 0, 1–2, 3, 4–6, 7–10, or  $\geq 11$  among women; GGT:  $\leq -27$ , -26 to -13, -12 to -7, -6 to -3, -2 to 0, 1–3, 4–7, 8–13, 14–27, or  $\geq 28$  among men;  $\leq -10$ , -9 to -5, -4 to -3, -2 to -1, 0–1, 2, 3–4, 5–7, 8–13, or  $\geq 14$  among women), instead of the above mentioned sex-non-specific cut-off points, to confirm the robustness of the results.

Figure Legends

Supplementary Figure 1. Associations<sup>a</sup> between deciles of changes in liver enzyme levels over a 4-year period and all-cause mortality, stratified by the quartiles of each baseline liver enzyme levels.

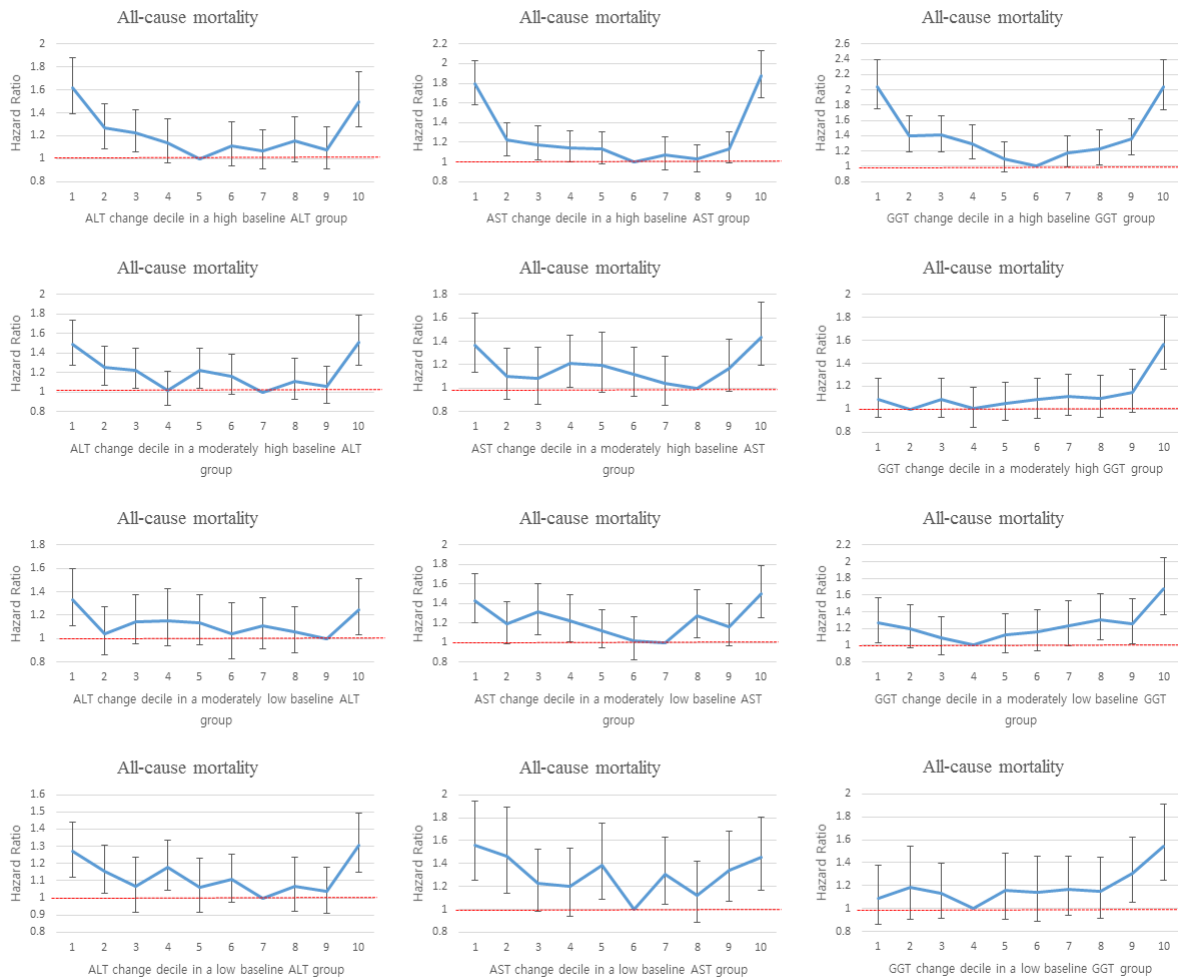

Abbreviations: ALT, alanine aminotransferase; AST, aspartate aminotransferase; GGT, gamma glutamyltransferase

1  
2  
3  
4 <sup>a</sup>Hazard ratios were estimated using Cox proportional hazard models adjusted for age, sex,  
5  
6 household income decile, smoking status, alcohol consumption, physical activity, body mass  
7  
8 index, systolic and diastolic blood pressure, fasting glucose levels, and past history of heart  
9  
10 disease, stroke, and cancer.  
11  
12  
13  
14  
15  
16  
17  
18  
19  
20  
21  
22  
23  
24  
25  
26  
27  
28  
29  
30  
31  
32  
33  
34  
35  
36  
37  
38  
39  
40  
41  
42  
43  
44  
45  
46  
47  
48  
49  
50  
51  
52  
53  
54

For peer review only

**Supplementary Figure 2.** Associations<sup>a</sup> between deciles of the baseline liver enzyme levels and cause-specific mortality.

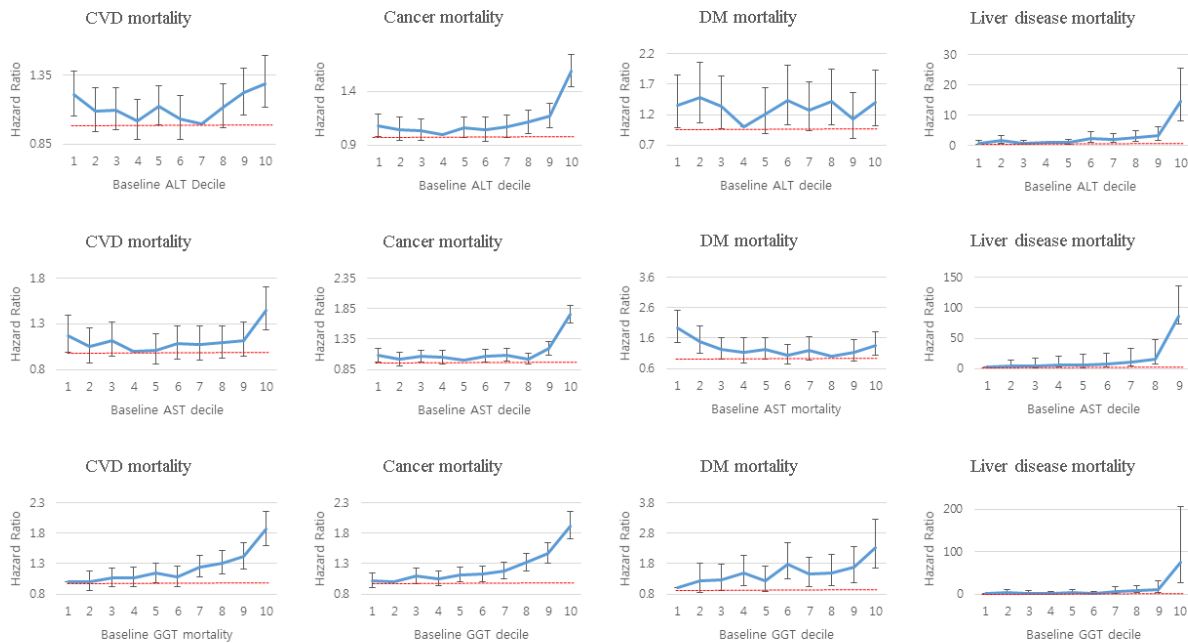

Abbreviations: ALT, alanine aminotransferase; AST, aspartate aminotransferase; GGT, gamma glutamyltransferase

<sup>a</sup>Hazard ratios were estimated using cause-specific proportional hazard models adjusted for age, sex, household income decile, smoking status, alcohol consumption, physical activity, body mass index, systolic and diastolic blood pressure, fasting glucose levels, and past history of heart disease, stroke, and cancer.

**Supplementary Figure 3.** Associations<sup>a</sup> between deciles of changes in liver enzyme levels over a 4-year period and cause-specific mortality.

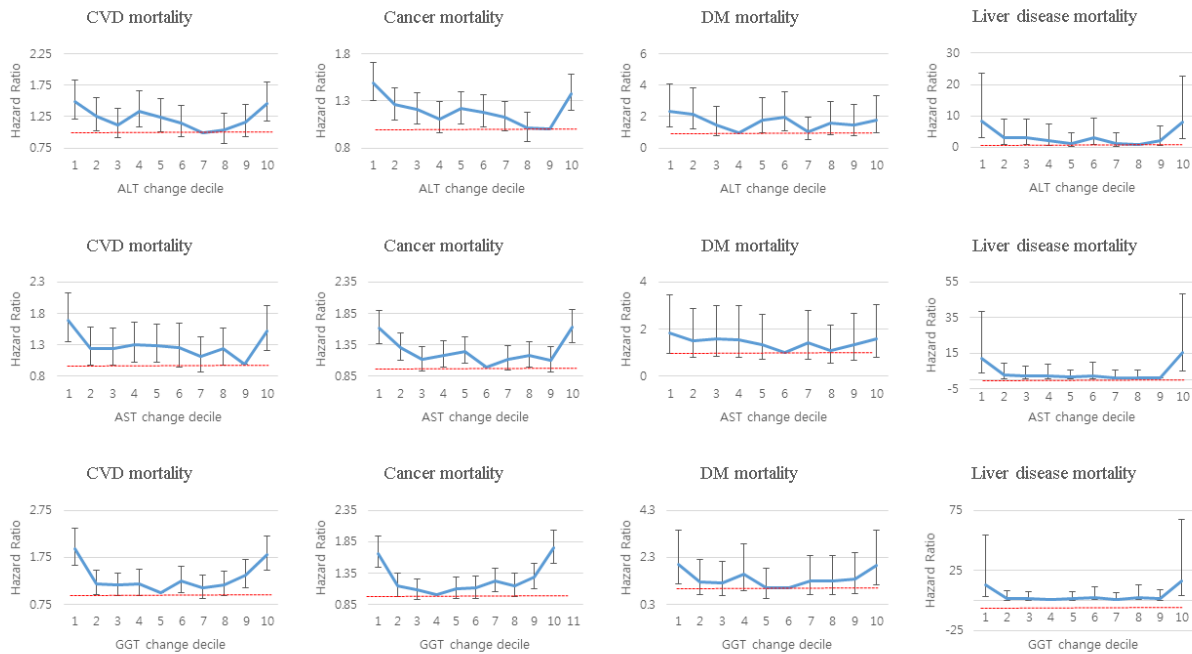

Abbreviations: ALT, alanine aminotransferase; AST, aspartate aminotransferase; GGT, gamma glutamyltransferase

<sup>a</sup>Hazard ratios were estimated using cause-specific proportional hazard models adjusted for age, sex, household income decile, smoking status, alcohol consumption, physical activity, body mass index, systolic and diastolic blood pressure, fasting glucose levels, and past history of heart disease, stroke, and cancer.



## STROBE Statement—checklist of items that should be included in reports of observational studies

|                              | Item No | Recommendation                                                                                                                                                                                                                                                                                                                                                                                                                                                         | Page No |
|------------------------------|---------|------------------------------------------------------------------------------------------------------------------------------------------------------------------------------------------------------------------------------------------------------------------------------------------------------------------------------------------------------------------------------------------------------------------------------------------------------------------------|---------|
| <b>Title and abstract</b>    | 1       | (a) Indicate the study's design with a commonly used term in the title or the abstract                                                                                                                                                                                                                                                                                                                                                                                 | 1       |
|                              |         | (b) Provide in the abstract an informative and balanced summary of what was done and what was found                                                                                                                                                                                                                                                                                                                                                                    | 3       |
| <b>Introduction</b>          |         |                                                                                                                                                                                                                                                                                                                                                                                                                                                                        |         |
| Background/rationale         | 2       | Explain the scientific background and rationale for the investigation being reported                                                                                                                                                                                                                                                                                                                                                                                   | 5       |
| Objectives                   | 3       | State specific objectives, including any prespecified hypotheses                                                                                                                                                                                                                                                                                                                                                                                                       | 5, 6    |
| <b>Methods</b>               |         |                                                                                                                                                                                                                                                                                                                                                                                                                                                                        |         |
| Study design                 | 4       | Present key elements of study design early in the paper                                                                                                                                                                                                                                                                                                                                                                                                                | 6       |
| Setting                      | 5       | Describe the setting, locations, and relevant dates, including periods of recruitment, exposure, follow-up, and data collection                                                                                                                                                                                                                                                                                                                                        | 6, 7    |
| Participants                 | 6       | (a) <i>Cohort study</i> —Give the eligibility criteria, and the sources and methods of selection of participants. Describe methods of follow-up<br><i>Case-control study</i> —Give the eligibility criteria, and the sources and methods of case ascertainment and control selection. Give the rationale for the choice of cases and controls<br><i>Cross-sectional study</i> —Give the eligibility criteria, and the sources and methods of selection of participants | 6, 7    |
|                              |         | (b) <i>Cohort study</i> —For matched studies, give matching criteria and number of exposed and unexposed<br><i>Case-control study</i> —For matched studies, give matching criteria and the number of controls per case                                                                                                                                                                                                                                                 |         |
| Variables                    | 7       | Clearly define all outcomes, exposures, predictors, potential confounders, and effect modifiers. Give diagnostic criteria, if applicable                                                                                                                                                                                                                                                                                                                               | 8       |
| Data sources/<br>measurement | 8*      | For each variable of interest, give sources of data and details of methods of assessment (measurement). Describe comparability of assessment methods if there is more than one group                                                                                                                                                                                                                                                                                   | 8       |
| Bias                         | 9       | Describe any efforts to address potential sources of bias                                                                                                                                                                                                                                                                                                                                                                                                              | 9, 10   |
| Study size                   | 10      | Explain how the study size was arrived at                                                                                                                                                                                                                                                                                                                                                                                                                              | 7       |
| Quantitative variables       | 11      | Explain how quantitative variables were handled in the analyses. If applicable, describe which groupings were chosen and why                                                                                                                                                                                                                                                                                                                                           | 9       |
| Statistical methods          | 12      | (a) Describe all statistical methods, including those used to control for confounding                                                                                                                                                                                                                                                                                                                                                                                  | 9, 10   |
|                              |         | (b) Describe any methods used to examine subgroups and interactions                                                                                                                                                                                                                                                                                                                                                                                                    | 10      |
|                              |         | (c) Explain how missing data were addressed                                                                                                                                                                                                                                                                                                                                                                                                                            | 9       |
|                              | 6       | (d) <i>Cohort study</i> —If applicable, explain how loss to follow-up was addressed<br><i>Case-control study</i> —If applicable, explain how matching of cases and controls was addressed<br><i>Cross-sectional study</i> —If applicable, describe analytical methods taking account of sampling strategy                                                                                                                                                              | 6       |
|                              |         | (e) Describe any sensitivity analyses                                                                                                                                                                                                                                                                                                                                                                                                                                  |         |

Continued on next page

1  
2  
3  
4  
5  
6  
7  
8  
9  
10  
11  
12  
13  
14  
15  
16  
17  
18  
19  
20  
21  
22  
23  
24  
25  
26  
27  
28  
29  
30  
31  
32  
33  
34  
35  
36  
37  
38  
39  
40  
41  
42  
43  
44  
45  
46  
47  
48  
49  
50  
51  
52  
53  
54  
55  
56  
57  
58  
59  
60

| <b>Results</b>           |     |                                                                                                                                                                                                              |                |
|--------------------------|-----|--------------------------------------------------------------------------------------------------------------------------------------------------------------------------------------------------------------|----------------|
| Participants             | 13* | (a) Report numbers of individuals at each stage of study—eg numbers potentially eligible, examined for eligibility, confirmed eligible, included in the study, completing follow-up, and analysed            | 7              |
|                          |     | (b) Give reasons for non-participation at each stage                                                                                                                                                         | 7              |
|                          |     | (c) Consider use of a flow diagram                                                                                                                                                                           |                |
| Descriptive data         | 14* | (a) Give characteristics of study participants (eg demographic, clinical, social) and information on exposures and potential confounders                                                                     | 11             |
|                          |     | (b) Indicate number of participants with missing data for each variable of interest                                                                                                                          | 23, 24         |
|                          |     | (c) <i>Cohort study</i> —Summarise follow-up time (eg, average and total amount)                                                                                                                             | 6              |
| Outcome data             | 15* | <i>Cohort study</i> —Report numbers of outcome events or summary measures over time                                                                                                                          | 11, 12         |
|                          |     | <i>Case-control study</i> —Report numbers in each exposure category, or summary measures of exposure                                                                                                         |                |
|                          |     | <i>Cross-sectional study</i> —Report numbers of outcome events or summary measures                                                                                                                           |                |
| Main results             | 16  | (a) Give unadjusted estimates and, if applicable, confounder-adjusted estimates and their precision (eg, 95% confidence interval). Make clear which confounders were adjusted for and why they were included | 11, 12         |
|                          |     | (b) Report category boundaries when continuous variables were categorized                                                                                                                                    | 26, 27, 29, 30 |
|                          |     | (c) If relevant, consider translating estimates of relative risk into absolute risk for a meaningful time period                                                                                             |                |
| Other analyses           | 17  | Report other analyses done—eg analyses of subgroups and interactions, and sensitivity analyses                                                                                                               | 12             |
| <b>Discussion</b>        |     |                                                                                                                                                                                                              |                |
| Key results              | 18  | Summarise key results with reference to study objectives                                                                                                                                                     | 13             |
| Limitations              | 19  | Discuss limitations of the study, taking into account sources of potential bias or imprecision. Discuss both direction and magnitude of any potential bias                                                   | 15             |
| Interpretation           | 20  | Give a cautious overall interpretation of results considering objectives, limitations, multiplicity of analyses, results from similar studies, and other relevant evidence                                   | 16             |
| Generalisability         | 21  | Discuss the generalisability (external validity) of the study results                                                                                                                                        | 15             |
| <b>Other information</b> |     |                                                                                                                                                                                                              |                |
| Funding                  | 22  | Give the source of funding and the role of the funders for the present study and, if applicable, for the original study on which the present article is based                                                | 16             |

\*Give information separately for cases and controls in case-control studies and, if applicable, for exposed and unexposed groups in cohort and cross-sectional studies.

**Note:** An Explanation and Elaboration article discusses each checklist item and gives methodological background and published examples of transparent reporting. The STROBE checklist is best used in conjunction with this article (freely available on the Web sites of PLoS Medicine at <http://www.plosmedicine.org/>, Annals of Internal Medicine at <http://www.annals.org/>, and Epidemiology at <http://www.epidem.com/>). Information on the STROBE Initiative is available at [www.strobe-statement.org](http://www.strobe-statement.org).
