# Supplementary material for: Associations of serum liver enzyme levels and their changes over time with all-cause and cause-specific mortality in the general population: a large-scale national health screening cohort study
Source: PubMed Central journal article supplement — BMJ Open. 2019 Jun 1;9(5):e026965. doi: 10.1136/bmjopen-2018-026965 (PMC6549731; doi:10.1136/bmjopen-2018-026965), 2019-06-01
Supplement: bmjopen-2018-026965supp001.pdf [file bmjopen-2018-026965supp001.pdf]

**Associations of serum liver enzyme levels and their changes over time with all-cause and cause-specific mortality in the general population: a large-scale national health screening cohort study**

Kyoung-Nam Kim, Jungmin Joo, Ho Kyung Sung, Chee Hae Kim, Haebin Kim, and Yong-Jin Kwon

**Table of Contents:**

**Supplementary Methods**

**Supplementary Figure 1.** Associations between deciles of changes in liver enzyme levels over a 4-year period and all-cause mortality, stratified by the quartiles of each baseline liver enzyme levels.

**Supplementary Figure 2.** Associations between deciles of the baseline liver enzyme levels and cause-specific mortality.

**Supplementary Figure 3.** Associations between deciles of changes in liver enzyme levels over a 4-year period and cause-specific mortality.

## Supplementary Methods

In a sensitivity analysis, because distributions of liver enzyme levels were different by sex (U/L, ALT: median, 25, interquartile range [IQR], 16 among men; median, 18, IQR, 10 among women; AST: median, 25, IQR, 11 among men; median, 22, IQR, 9 among women; GGT: median, 33, IQR, 34 among men; median, 16, IQR, 12 among women), we repeated all analyses using sex-specific cut-off points for deciles of the baseline liver enzyme levels (U/L, ALT:  $\leq 14$ , 15–16, 17–19, 20–21, 22–24, 25–27, 28–31, 32–37, 38–48, or  $\geq 49$  among men;  $\leq 10$ , 11–12, 13–14, 15–16, 17, 18–19, 20–22, 23–26, 27–33, or  $\geq 34$  among women; AST:  $\leq 17$ , 18–19, 20–21, 22–23, 24–25, 26–27, 28–29, 30–33, 34–40, or  $\geq 41$  among men;  $\leq 15$ , 16–17, 18–19, 20, 21–22, 23, 24–25, 26–28, 29–33, or  $\geq 34$  among women; GGT:  $\leq 15$ , 16–19, 20–23, 24–27, 28–32, 33–39, 40–48, 49–63, 64–95, or  $\geq 96$  among men;  $\leq 9$ , 10–11, 12, 13–14, 15–16, 17–18, 19–21, 22–26, 27–35, or  $\geq 36$  among women) and changes in liver enzyme levels (U/L, ALT:  $\leq -19$ , -18 to -11, -10 to -7, -6 to -4, -3 to -1, 0–1, 2–4, 5–7, 8–14, or  $\geq 15$  among men;  $\leq -12$ , -11 to -7, -6 to -4, -3 to -2, -1 to 0, 1–2, 3–4, 5–7, 8–12, or  $\geq 13$  among women; AST:  $\leq -13$ , -12 to -8, -7 to -5, -4 to -3, -2 to -1, 0–1, 2–3, 4–6, 7–10, or  $\geq 11$  among men;  $\leq -10$ , -9 to -6, -5 to -3, -2, -1 to 0, 1–2, 3, 4–6, 7–10, or  $\geq 11$  among women; GGT:  $\leq -27$ , -26 to -13, -12 to -7, -6 to -3, -2 to 0, 1–3, 4–7, 8–13, 14–27, or  $\geq 28$  among men;  $\leq -10$ , -9 to -5, -4 to -3, -2 to -1, 0–1, 2, 3–4, 5–7, 8–13, or  $\geq 14$  among women), instead of the above mentioned sex-non-specific cut-off points, to confirm the robustness of the results.

## Figure Legends

**Supplementary Figure 1.** Associations<sup>a</sup> between deciles of changes in liver enzyme levels over a 4-year period and all-cause mortality, stratified by the quartiles of each baseline liver enzyme levels.

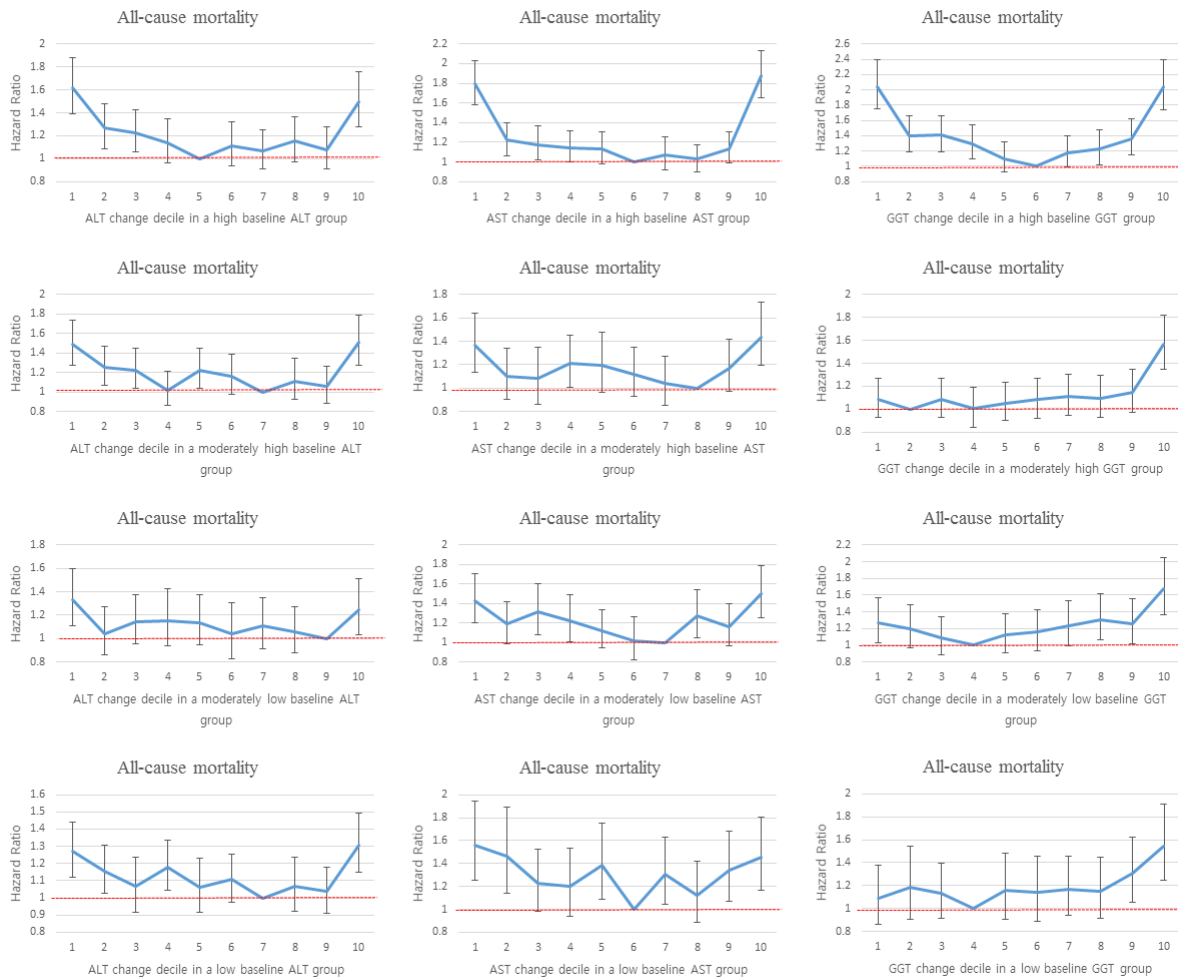

Abbreviations: ALT, alanine aminotransferase; AST, aspartate aminotransferase; GGT, gamma glutamyltransferase

<sup>a</sup>Hazard ratios were estimated using Cox proportional hazard models adjusted for age, sex, household income decile, smoking status, alcohol consumption, physical activity, body mass index, systolic and diastolic blood pressure, fasting glucose levels, and past history of heart disease, stroke, and cancer.

**Supplementary Figure 2.** Associations<sup>a</sup> between deciles of the baseline liver enzyme levels and cause-specific mortality.

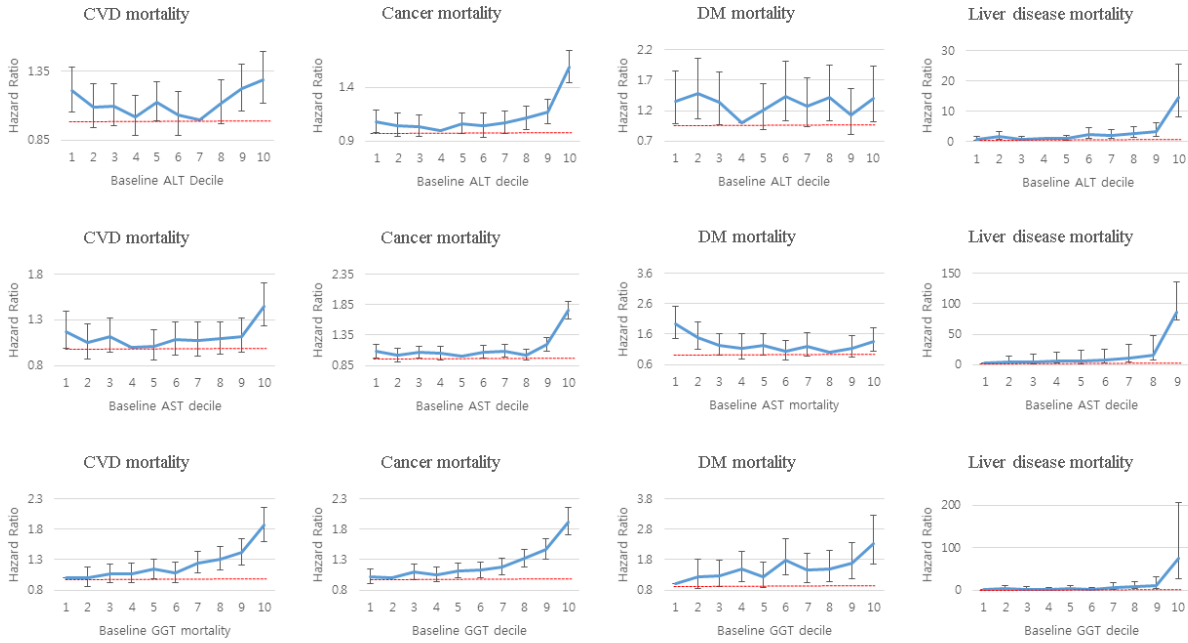

Abbreviations: ALT, alanine aminotransferase; AST, aspartate aminotransferase; GGT, gamma glutamyltransferase

<sup>a</sup>Hazard ratios were estimated using cause-specific proportional hazard models adjusted for age, sex, household income decile, smoking status, alcohol consumption, physical activity, body mass index, systolic and diastolic blood pressure, fasting glucose levels, and past history of heart disease, stroke, and cancer.

**Supplementary Figure 3.** Associations<sup>a</sup> between deciles of changes in liver enzyme levels over a 4-year period and cause-specific mortality.

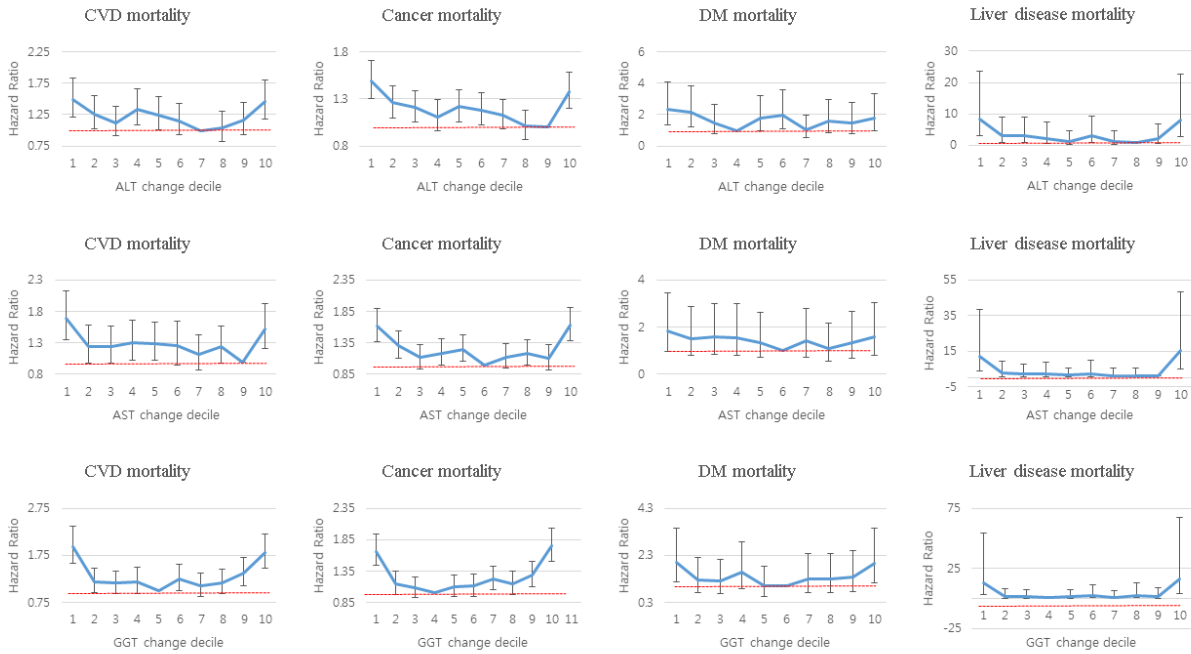

Abbreviations: ALT, alanine aminotransferase; AST, aspartate aminotransferase; GGT, gamma glutamyltransferase

<sup>a</sup>Hazard ratios were estimated using cause-specific proportional hazard models adjusted for age, sex, household income decile, smoking status, alcohol consumption, physical activity, body mass index, systolic and diastolic blood pressure, fasting glucose levels, and past history of heart disease, stroke, and cancer.
